# Supplementary material for: First Synthesis of DBU-Conjugated Cationic Carbohydrate Derivatives and Investigation of Their Antibacterial and Antifungal Activity
Source: MDPI journal article supplement (doi:10.3390/ijms24043550), 2023-02-10

# Supporting Information

## First synthesis of DBU-conjugated cationic carbohydrate derivatives and investigation of their antibacterial and antifungal activity

Fruzsina Demeter <sup>1</sup>, Patrik Török <sup>1</sup>, Alexandra Kiss <sup>2</sup>, Richárd Kovásznai-Oláh <sup>2</sup>, Zsuzsa Máthéné Szigeti <sup>2</sup>, Viktória Baksa <sup>2</sup>, Fruzsina Kovács <sup>3,4</sup>, Noémi Balla <sup>3,4</sup>, Ferenc Fenyvesi <sup>5</sup>, Judit Váradi <sup>5</sup>, Anikó Borbás <sup>1,\*</sup> and Mihály Herczeg <sup>1,\*</sup>

<sup>1</sup>*Department of Pharmaceutical Chemistry, Faculty of Pharmacy, University of Debrecen, Egyetem tér 1, H-4032 Debrecen, Hungary*

<sup>2</sup>*Institute of Biotechnology, Faculty of Science and Technology, University of Debrecen, Egyetem tér 1, H-4032, Debrecen, Hungary.*

<sup>3</sup>*Department of Medical Microbiology, Faculty of Medicine, University of Debrecen, 4032 Debrecen, Hungary;*

<sup>4</sup>*Doctoral School of Pharmaceutical Sciences, University of Debrecen, 4032 Debrecen, Hungary*

<sup>5</sup>*Department of Pharmaceutical Technology, Faculty of Pharmacy, University of Debrecen, Nagyerdő Körút 98., H-4032, Debrecen, Hungary;*

E-mail: borbas.aniko@pharm.unideb.hu; herczeg.mihaly@pharm.unideb.hu

### Table of Contents

|                                                                             |   |
|-----------------------------------------------------------------------------|---|
| <sup>1</sup> H and <sup>13</sup> C NMR spectra of the synthesized compounds | 2 |
|-----------------------------------------------------------------------------|---|

$^1\text{H}$  and  $^{13}\text{C}$  NMR spectra of compound **39**

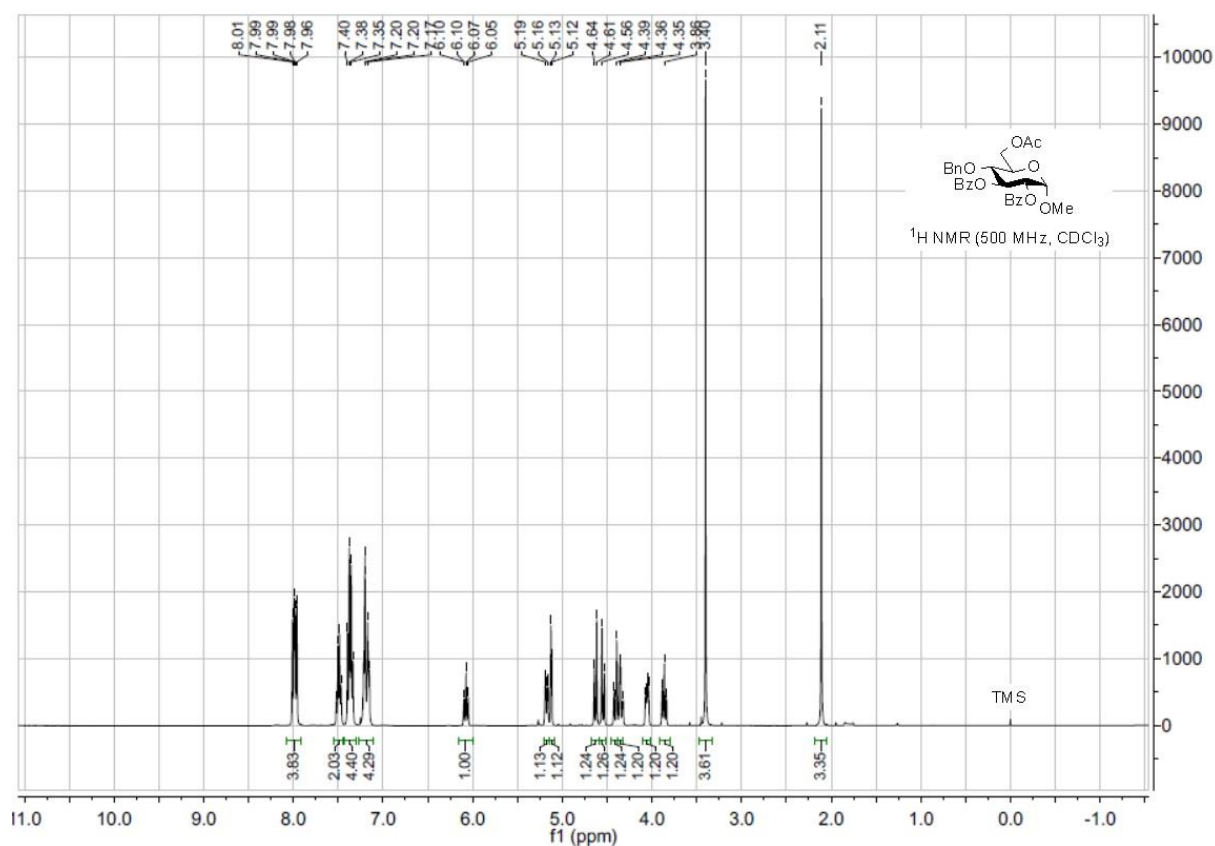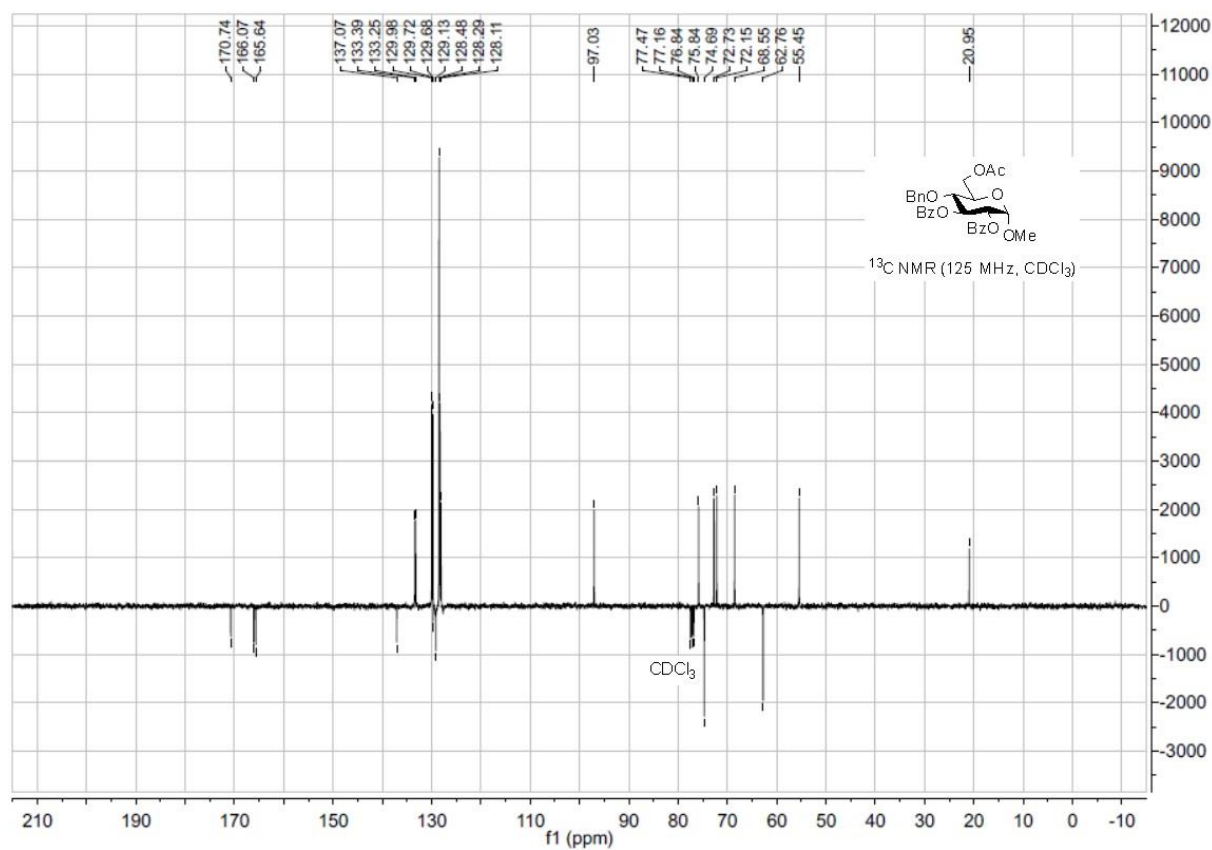

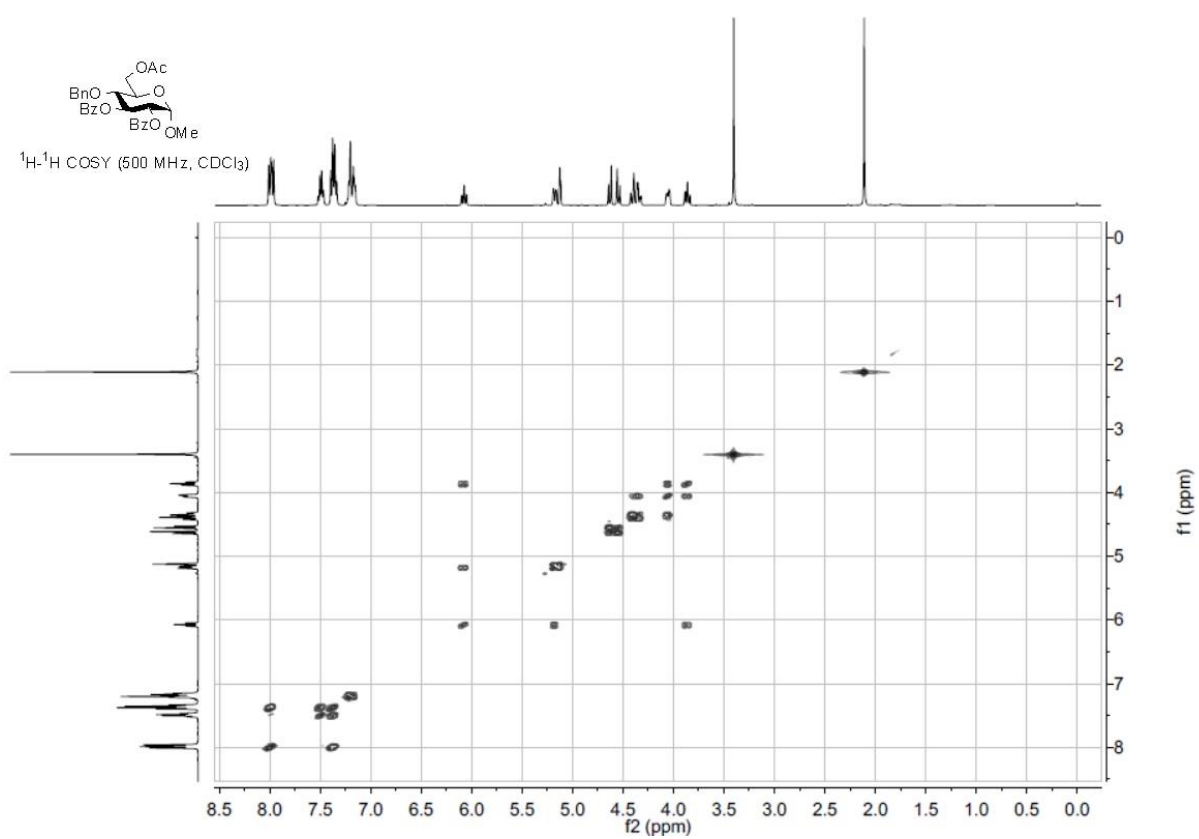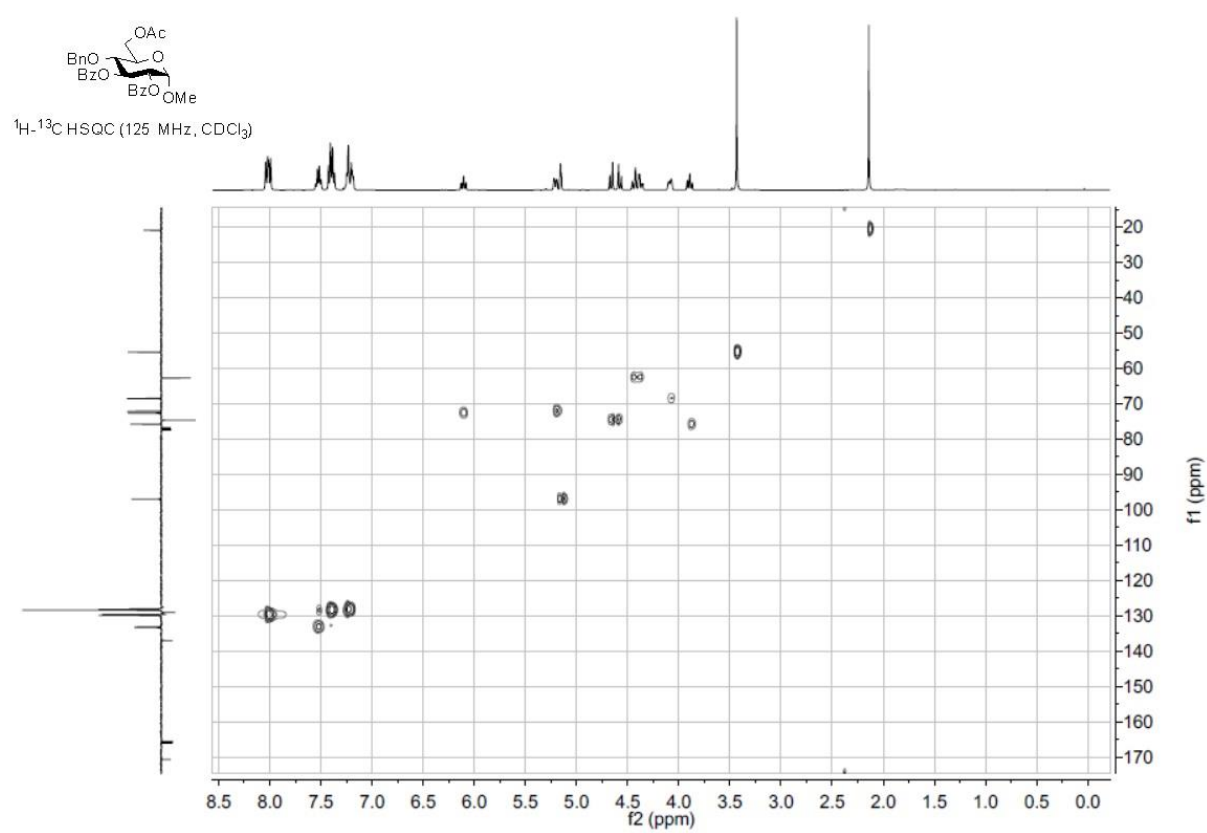

$^1\text{H}$  and  $^{13}\text{C}$  NMR spectra of compound **43**

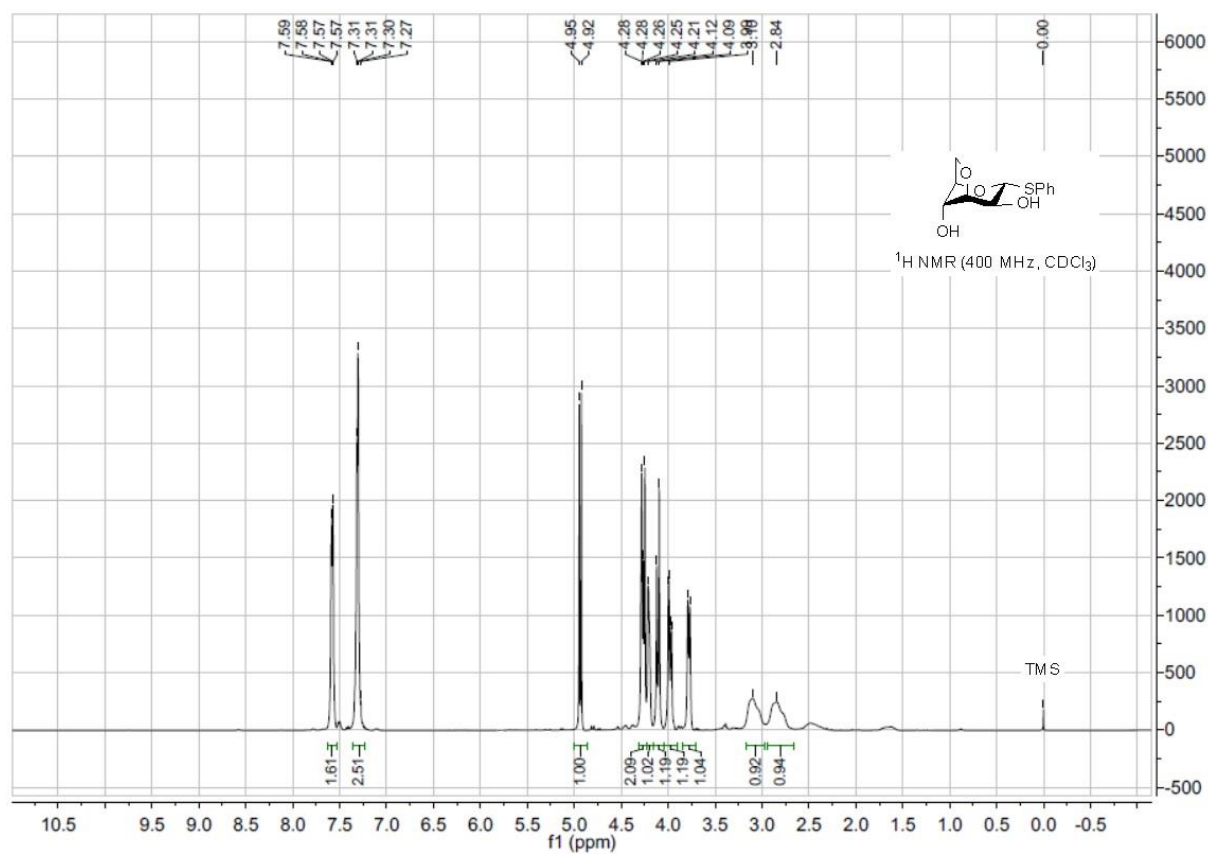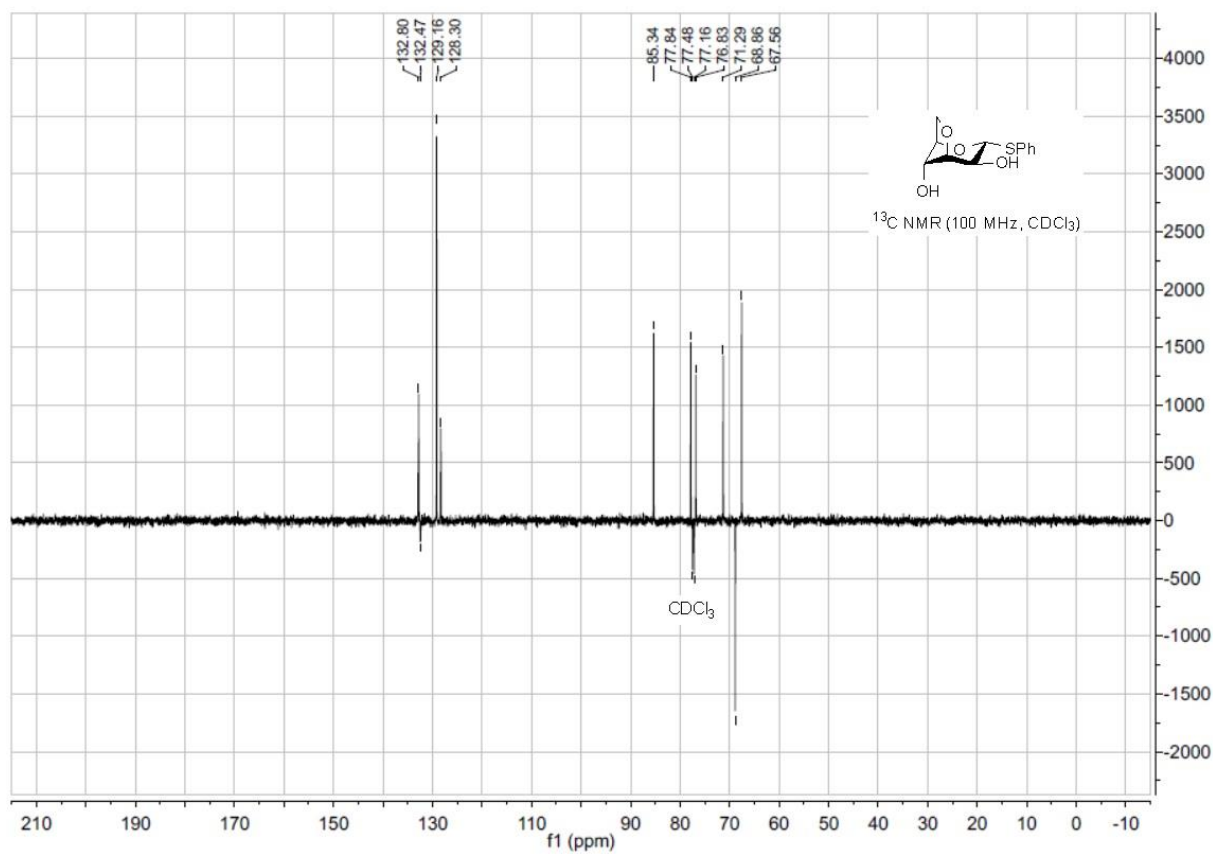

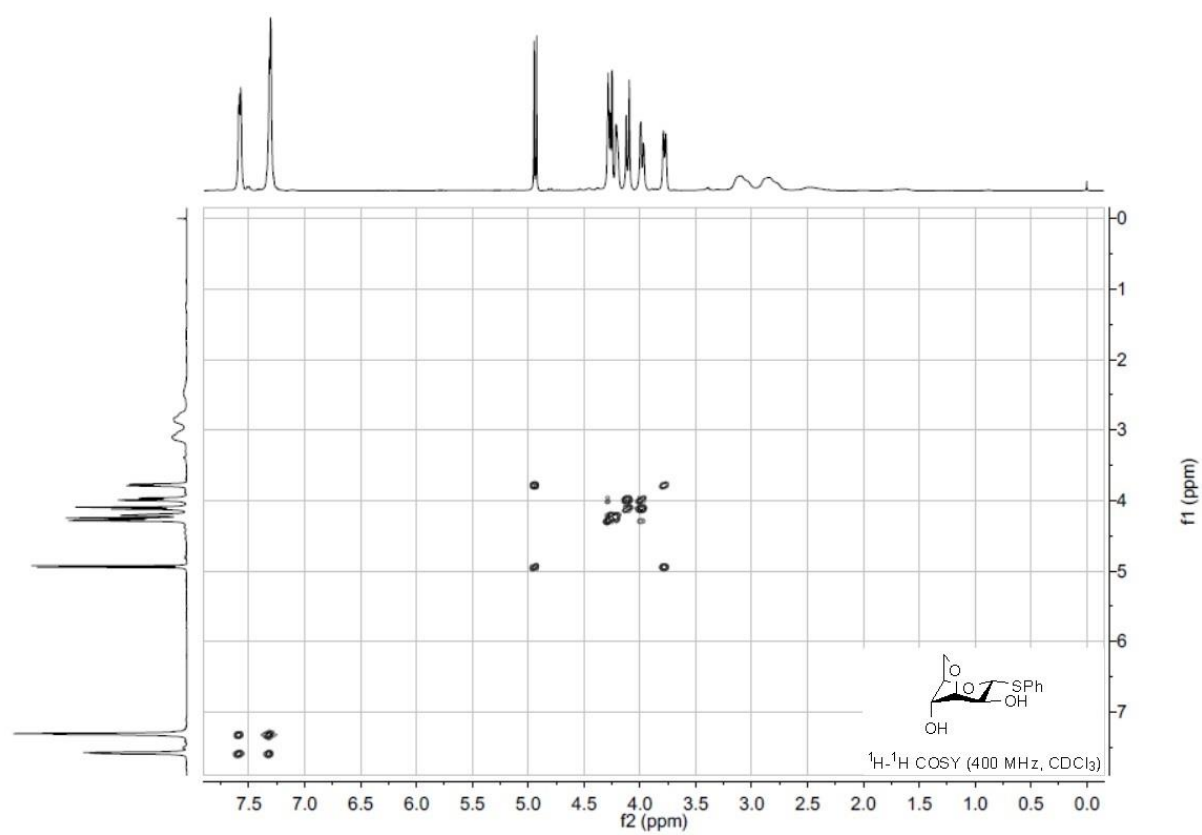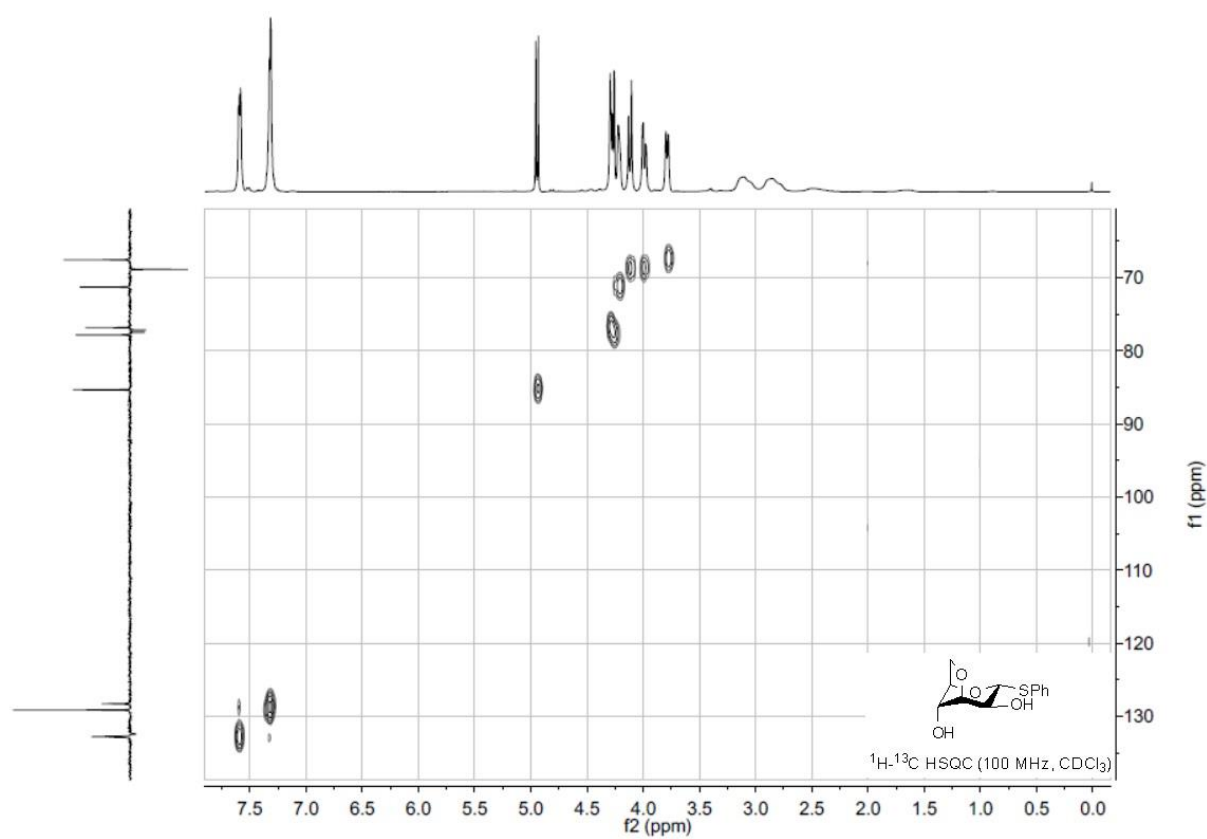

$^1\text{H}$  and  $^{13}\text{C}$  NMR spectra of compound 45

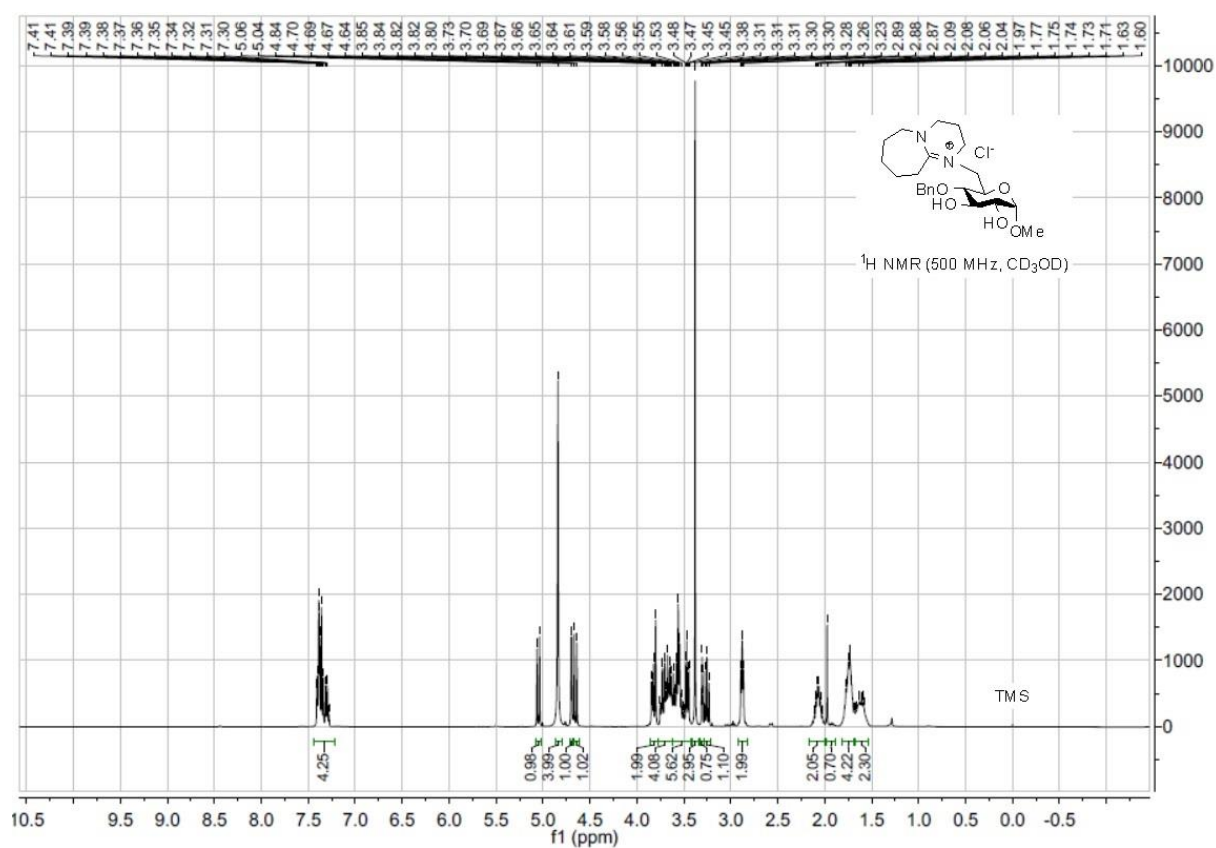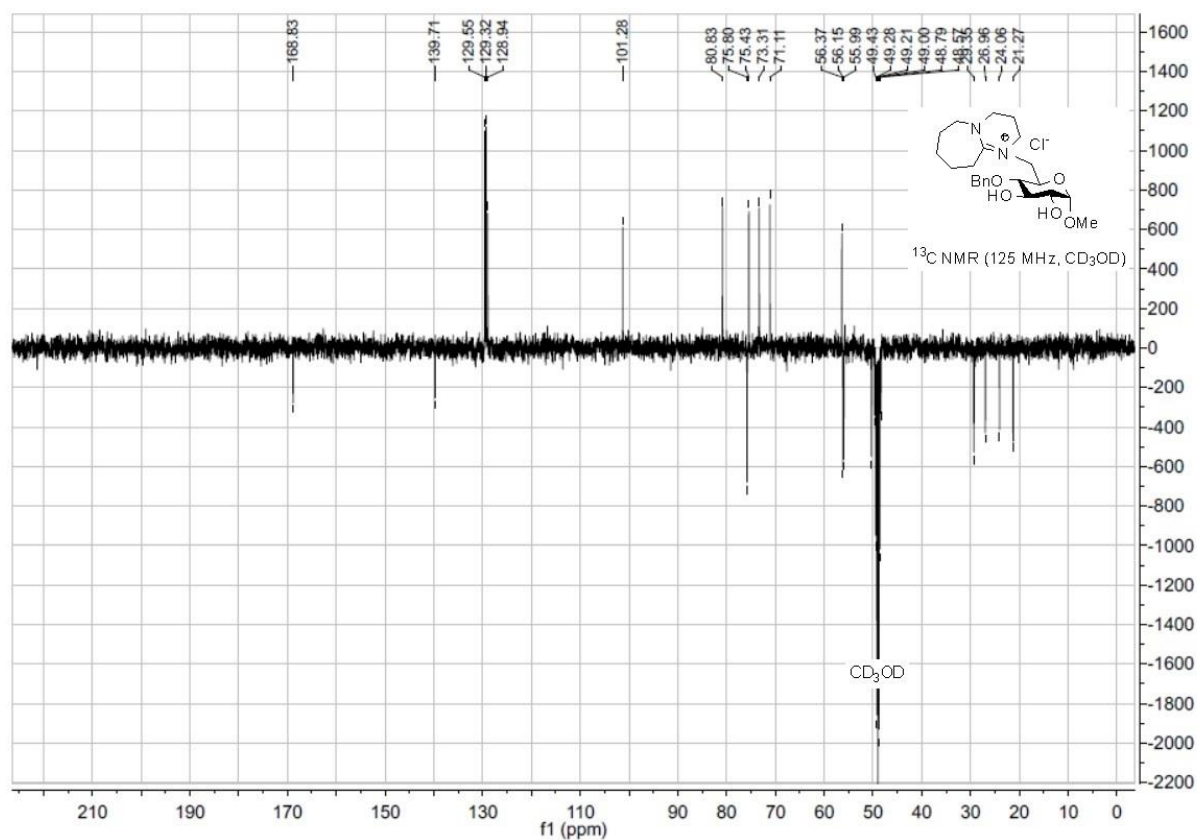

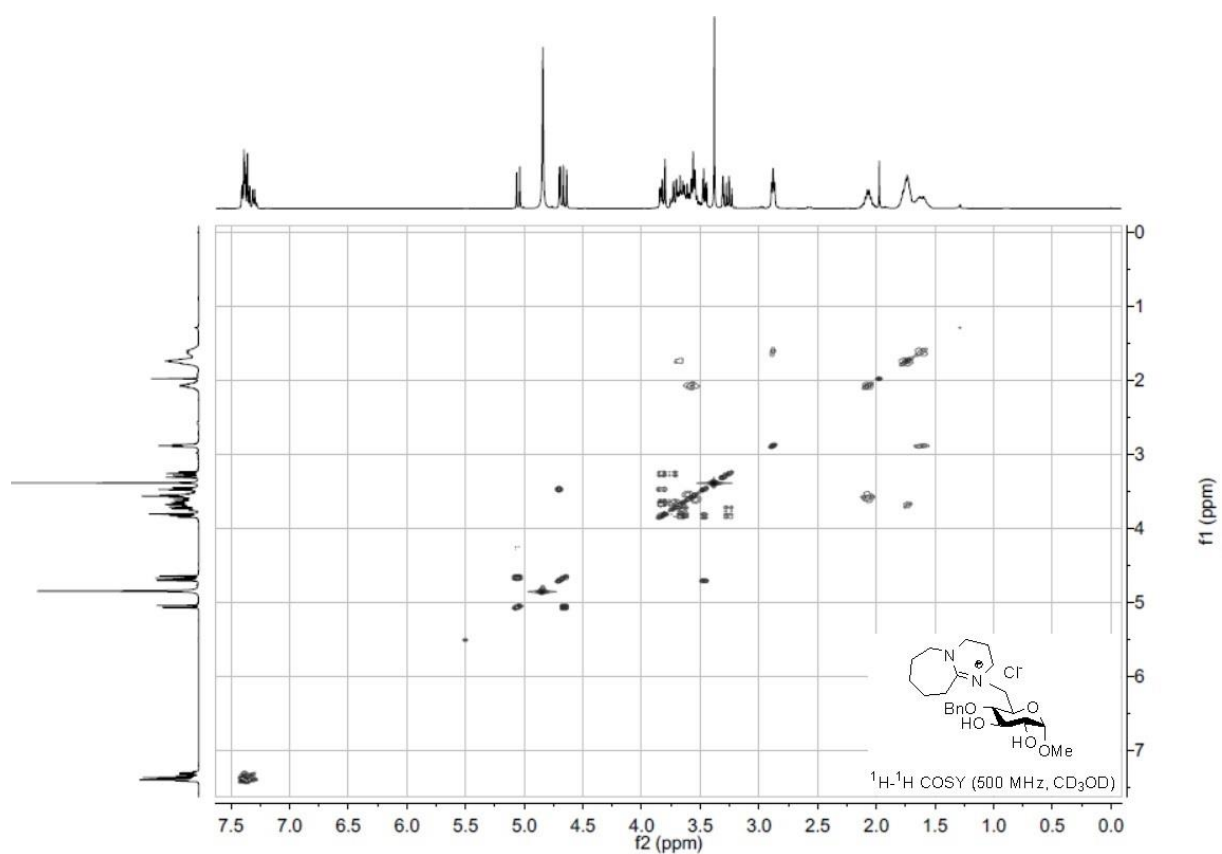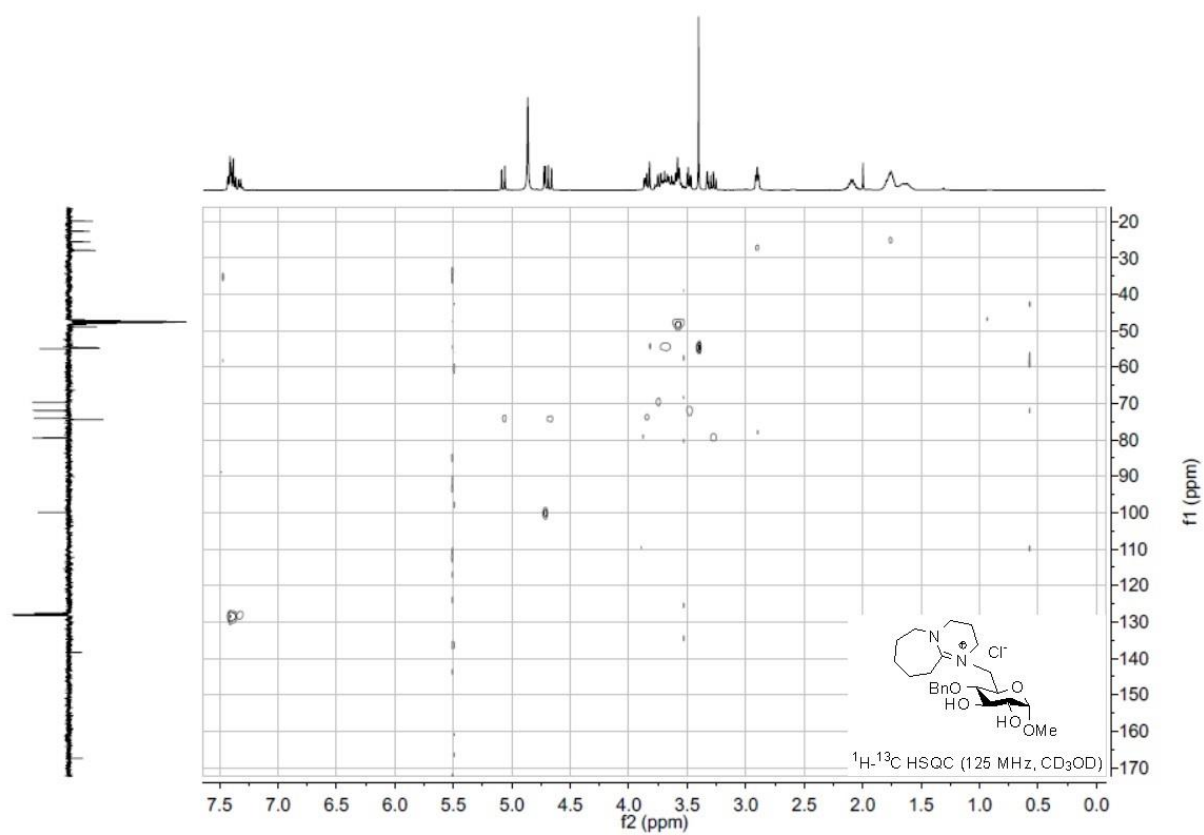

$^1\text{H}$  and  $^{13}\text{C}$  NMR spectra of compound **46**

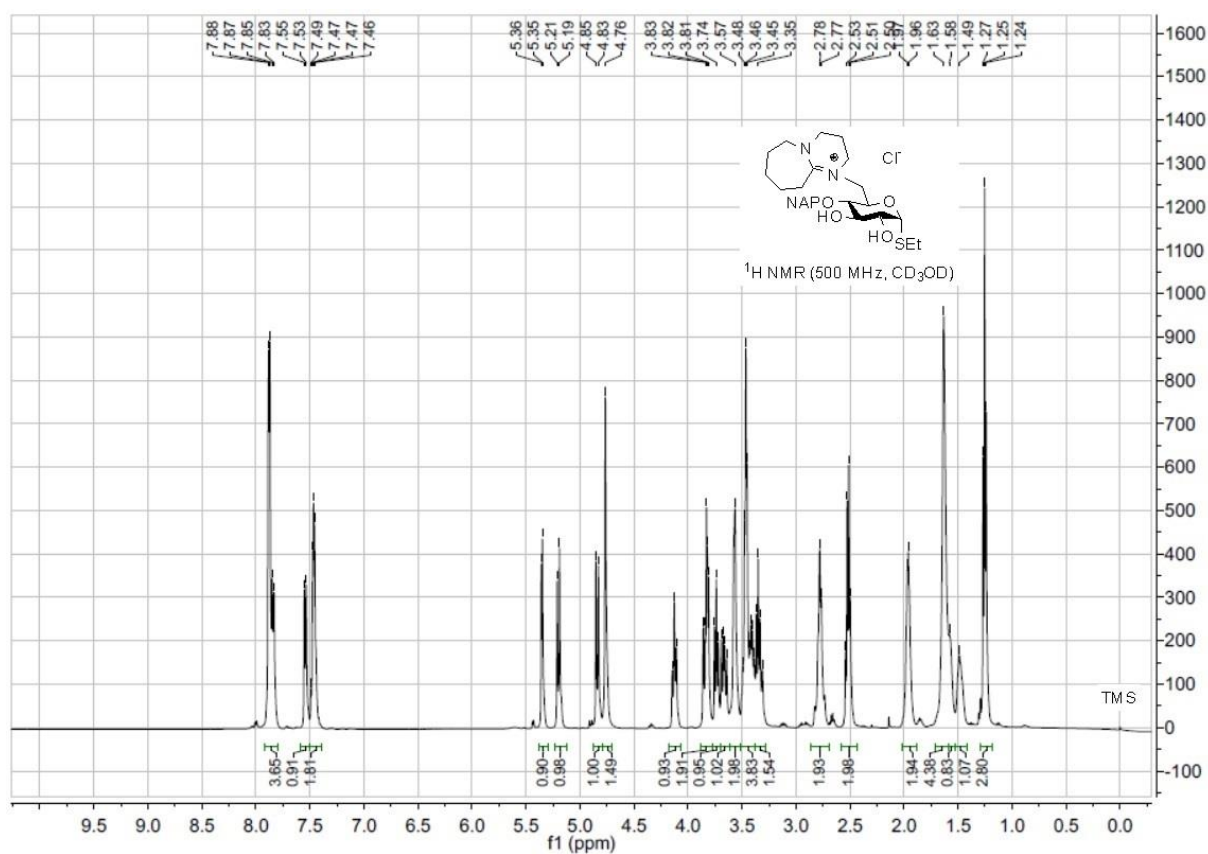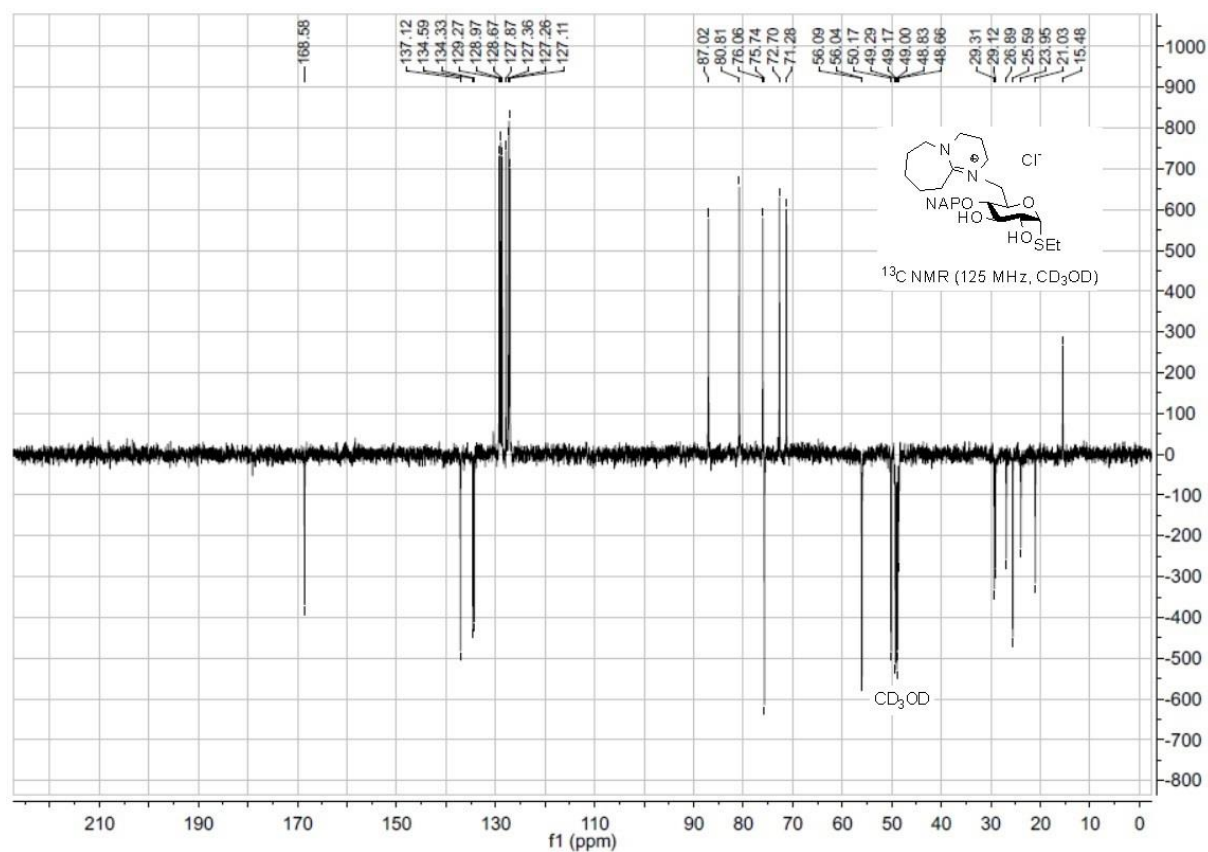



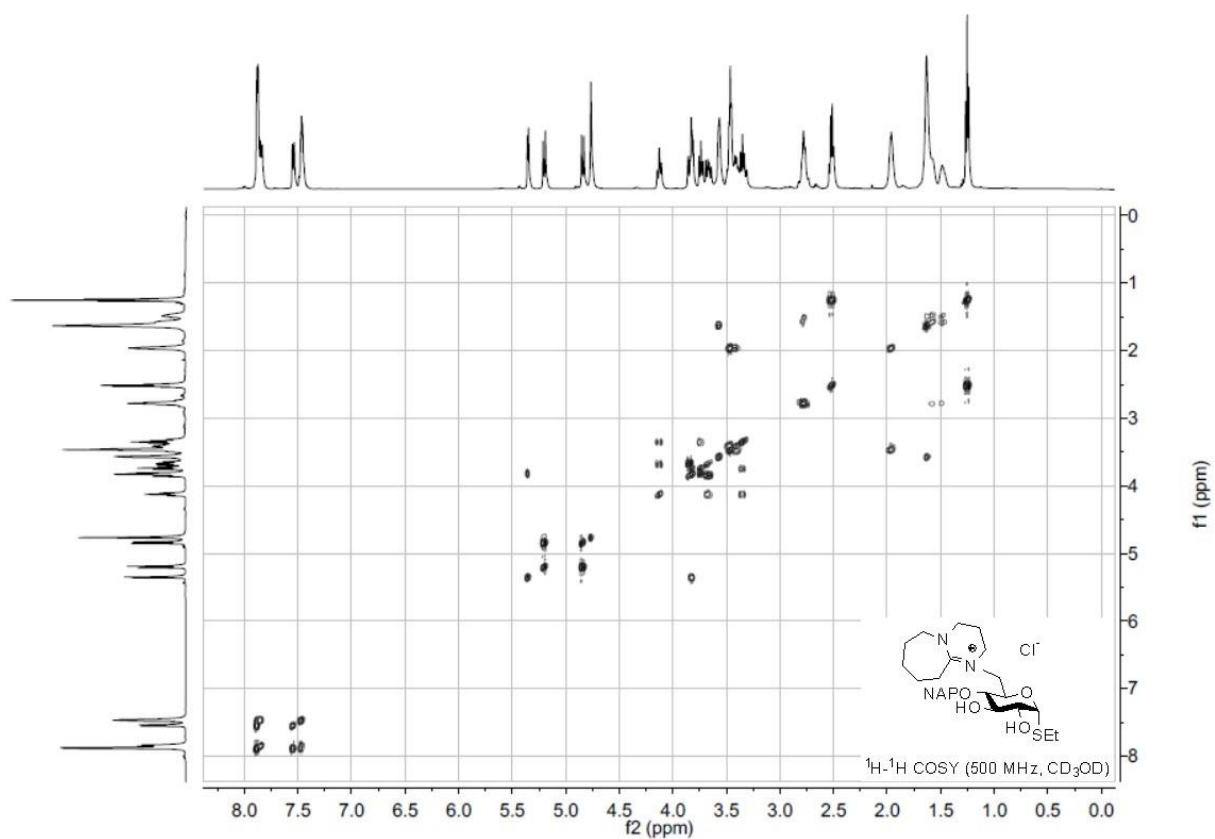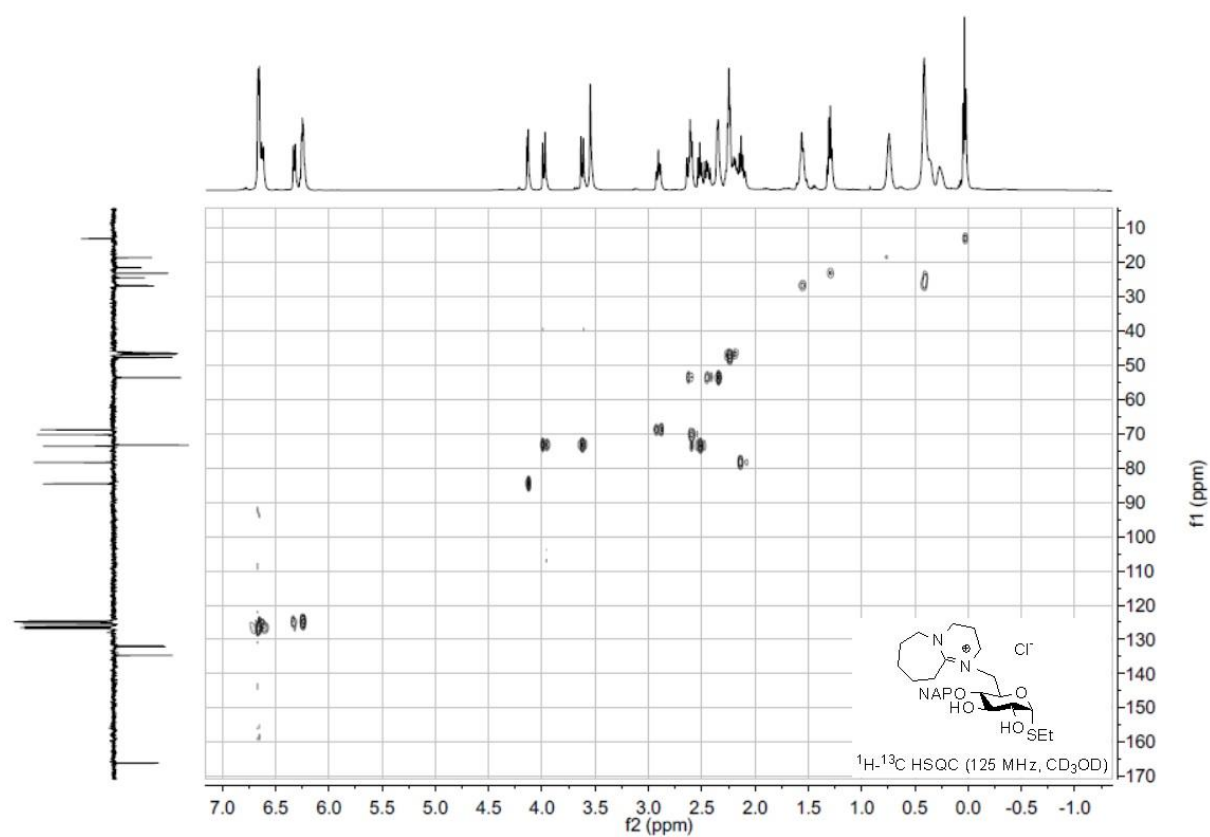

$^1\text{H}$  and  $^{13}\text{C}$  NMR spectra of compound **47**

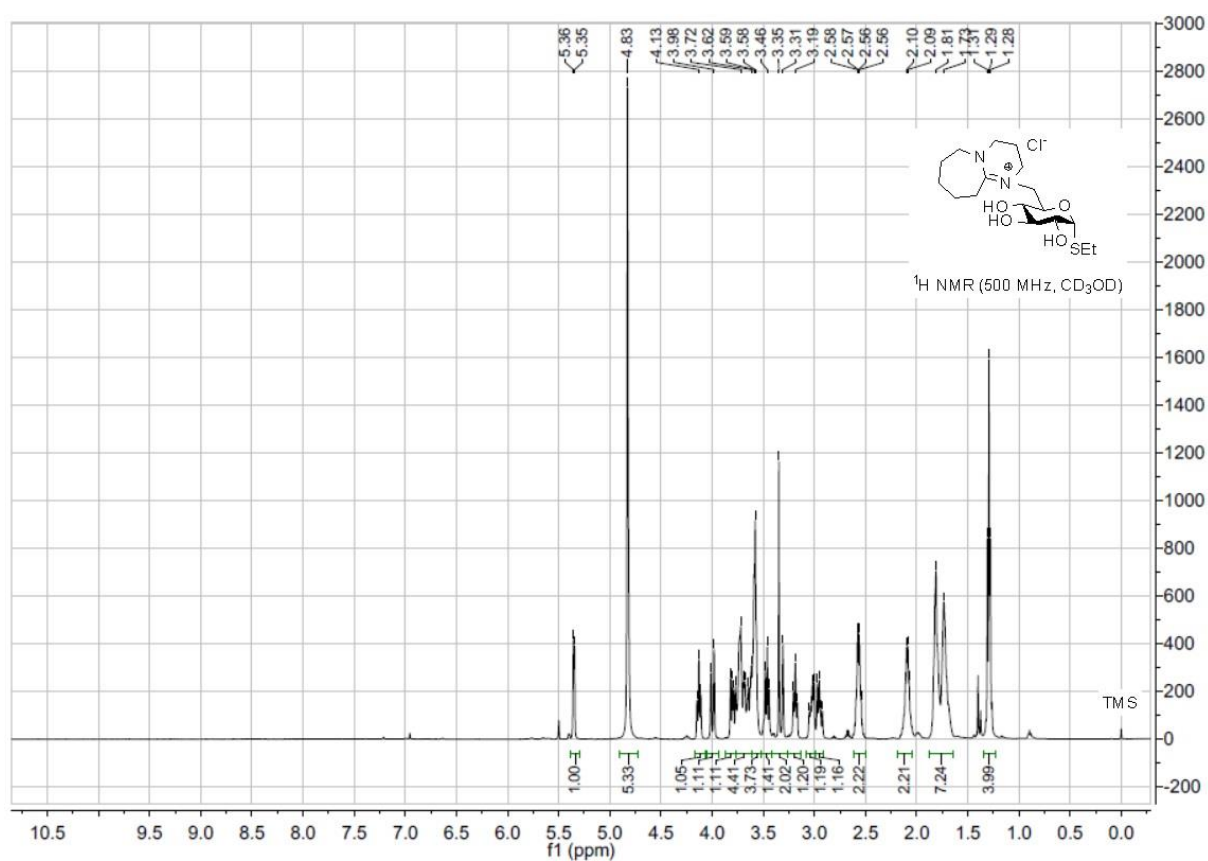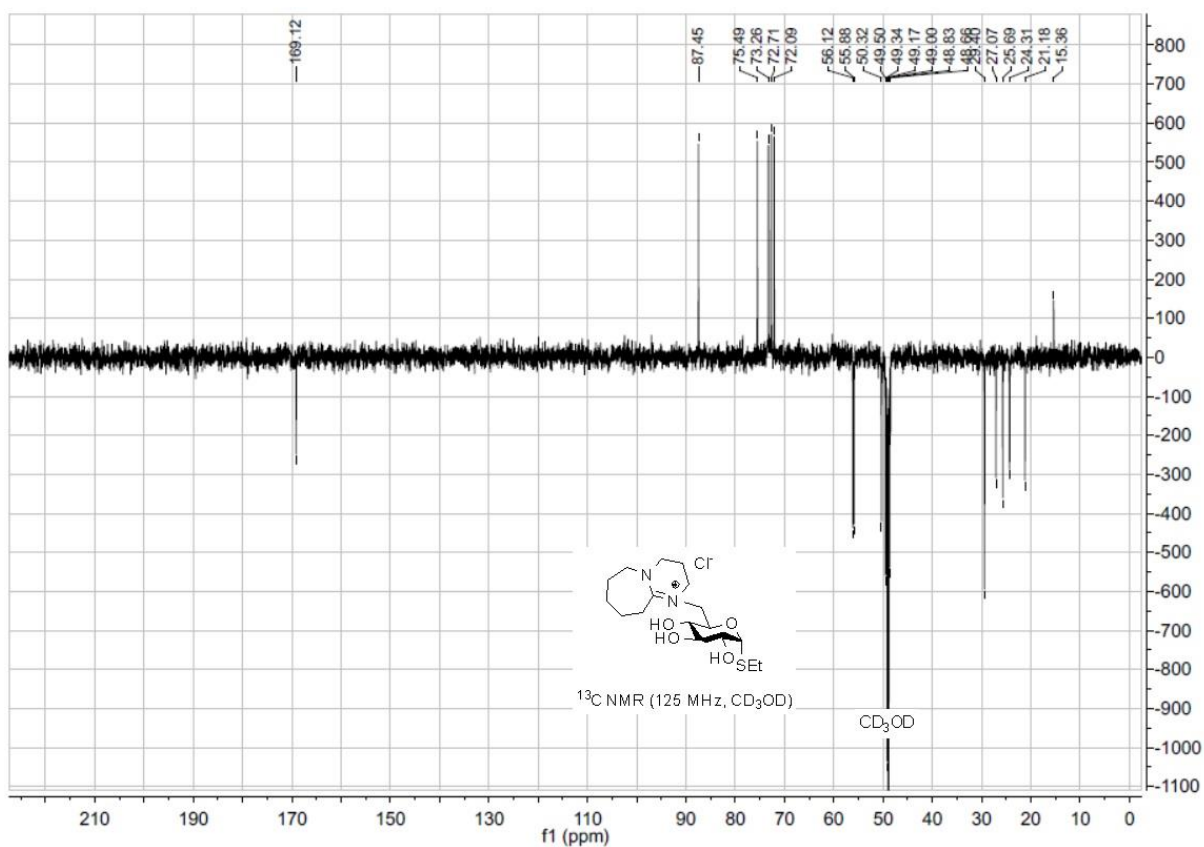

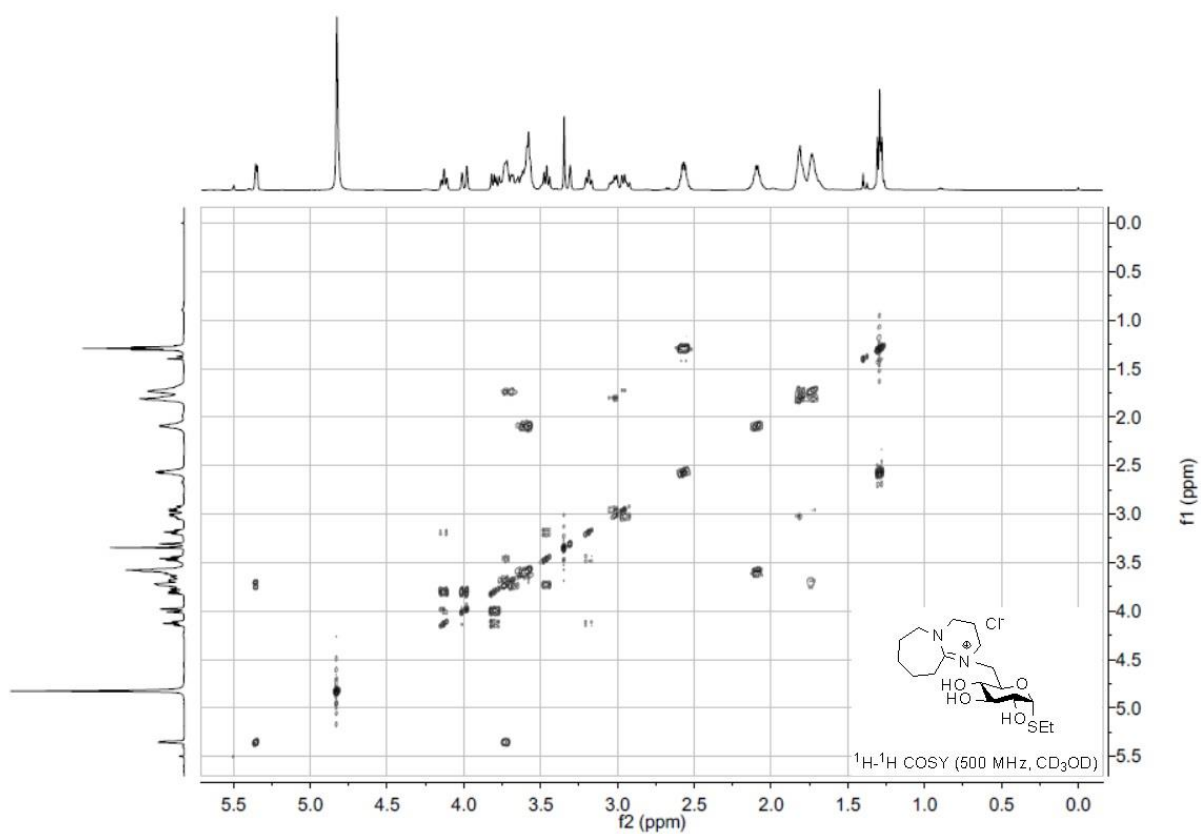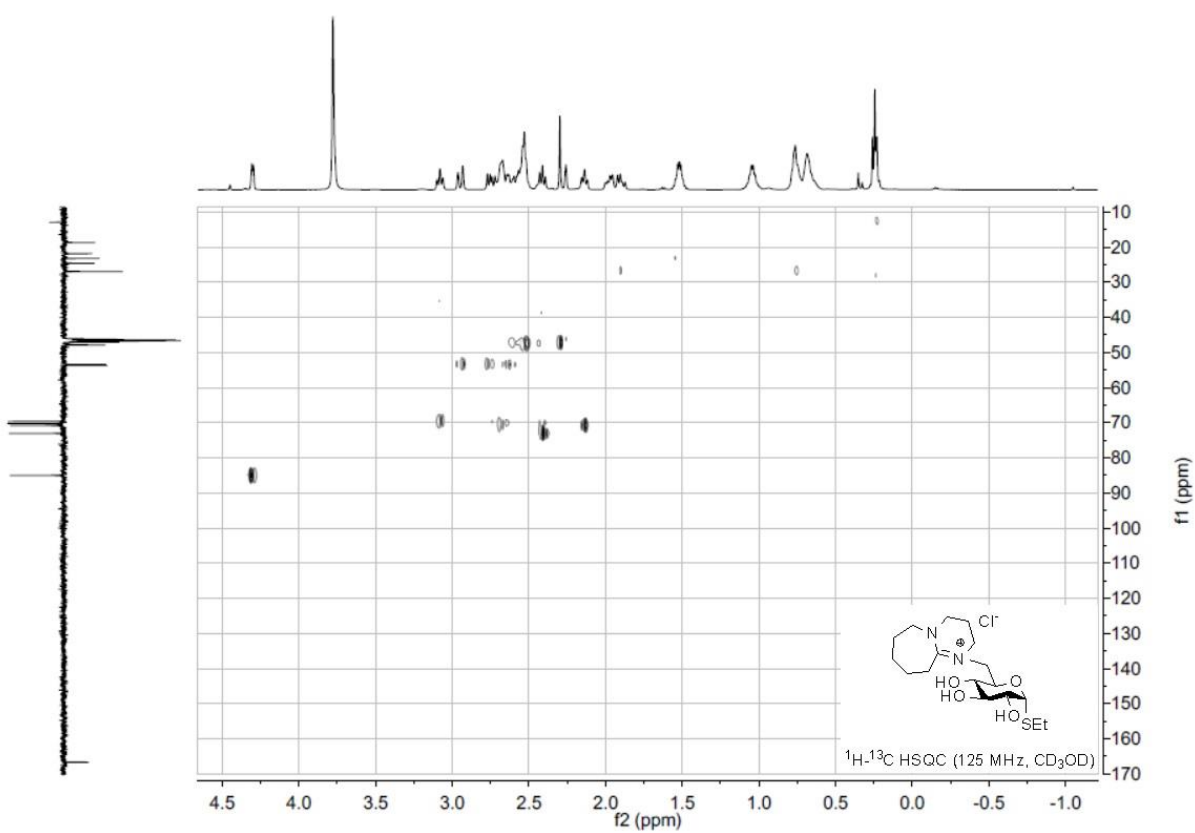

$^1\text{H}$  and  $^{13}\text{C}$  NMR spectra of compound **48**

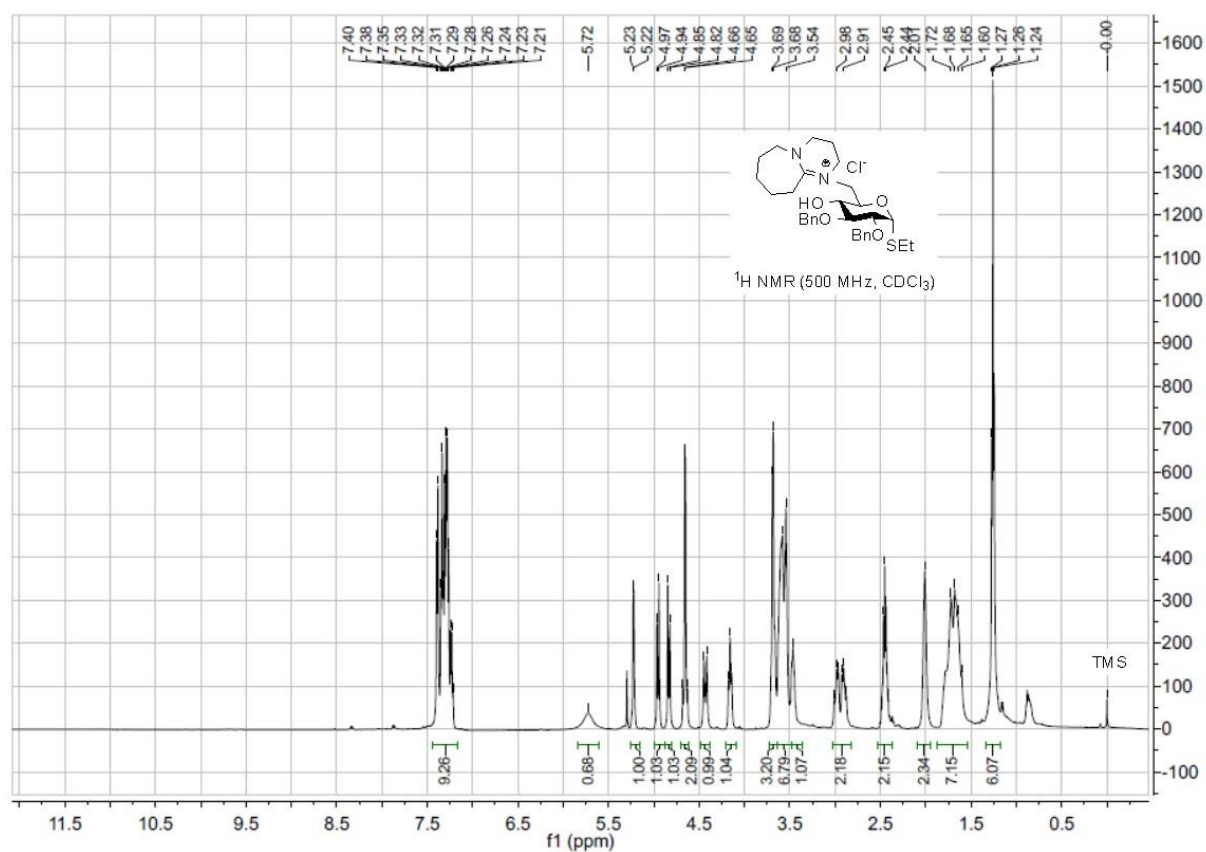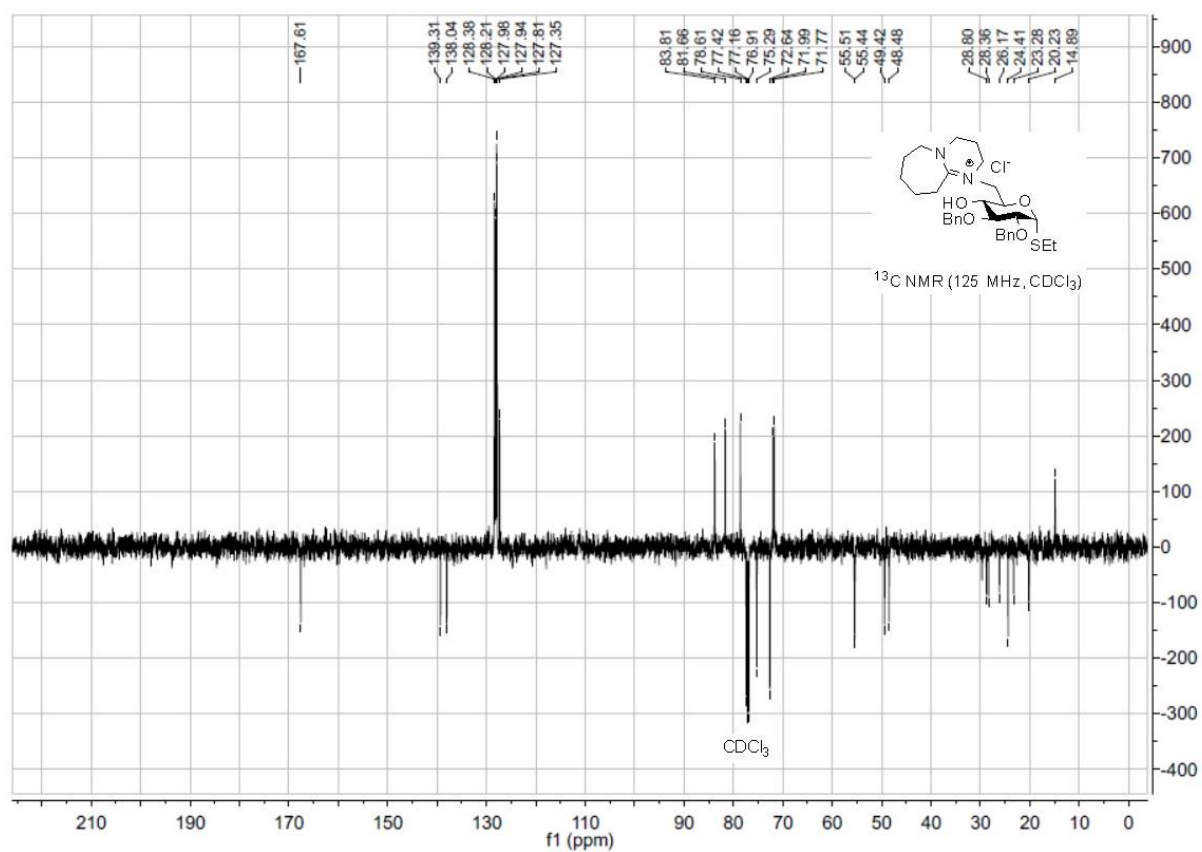

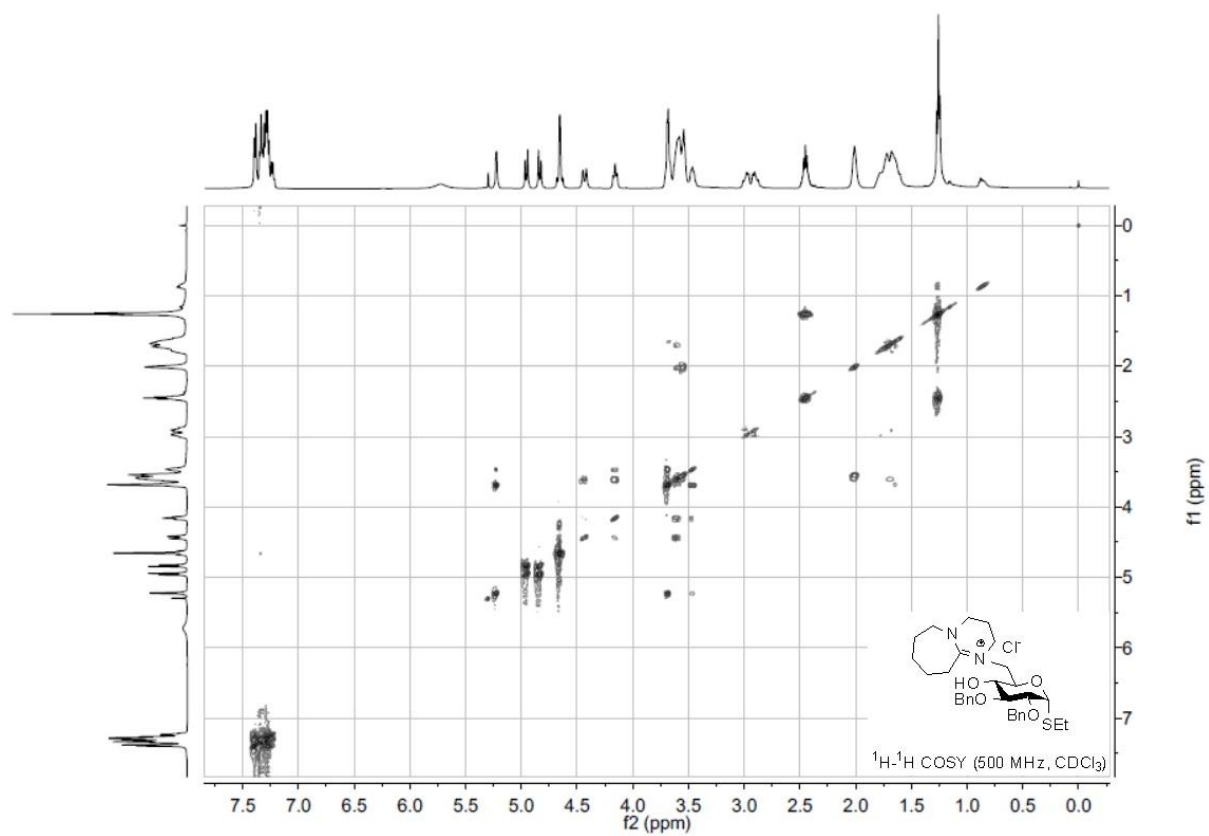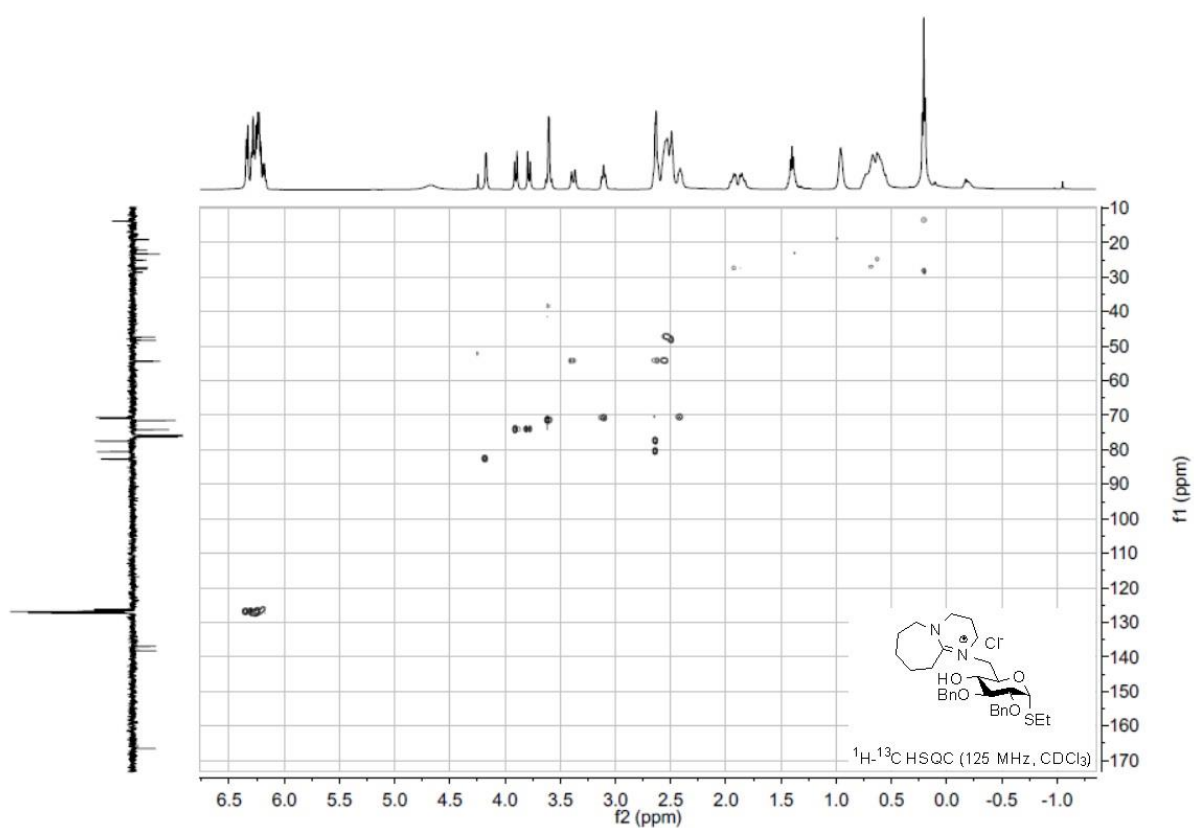

$^1\text{H}$  and  $^{13}\text{C}$  NMR spectra of compound **49**

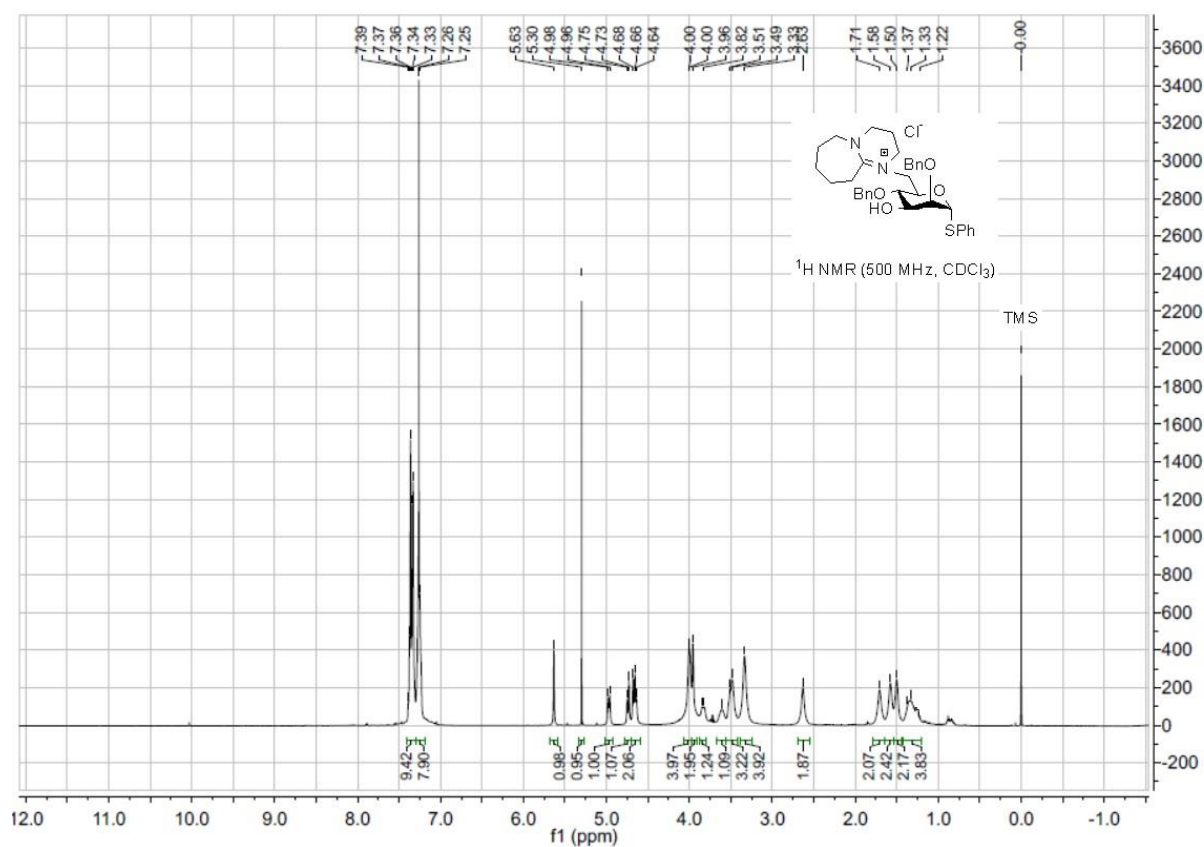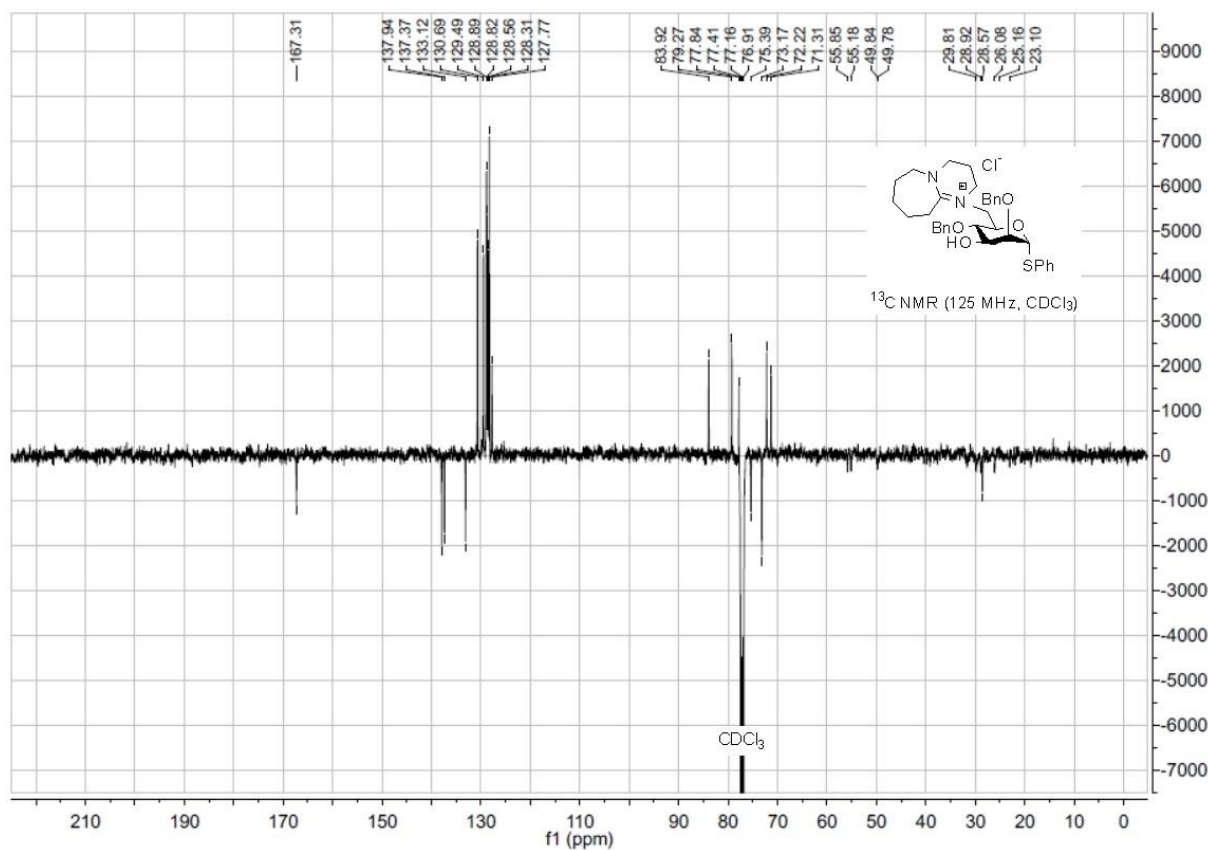

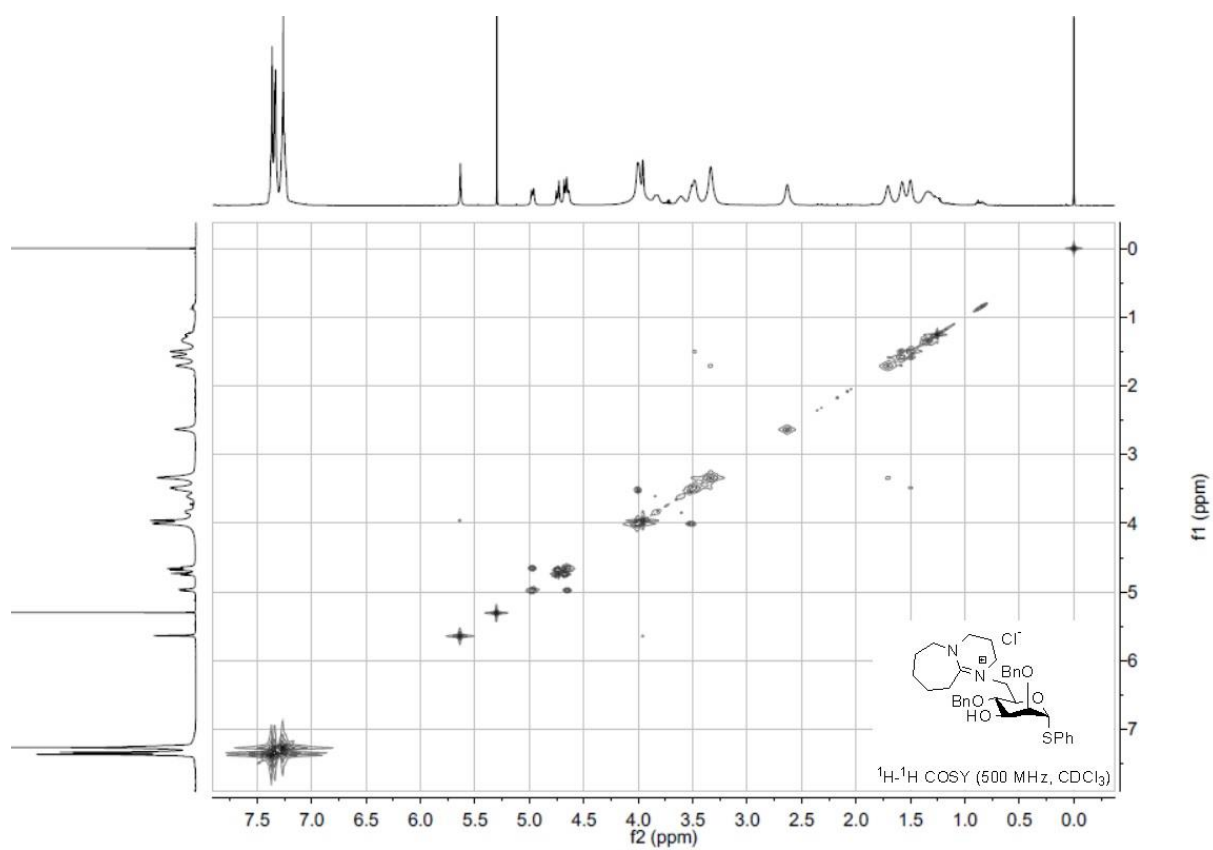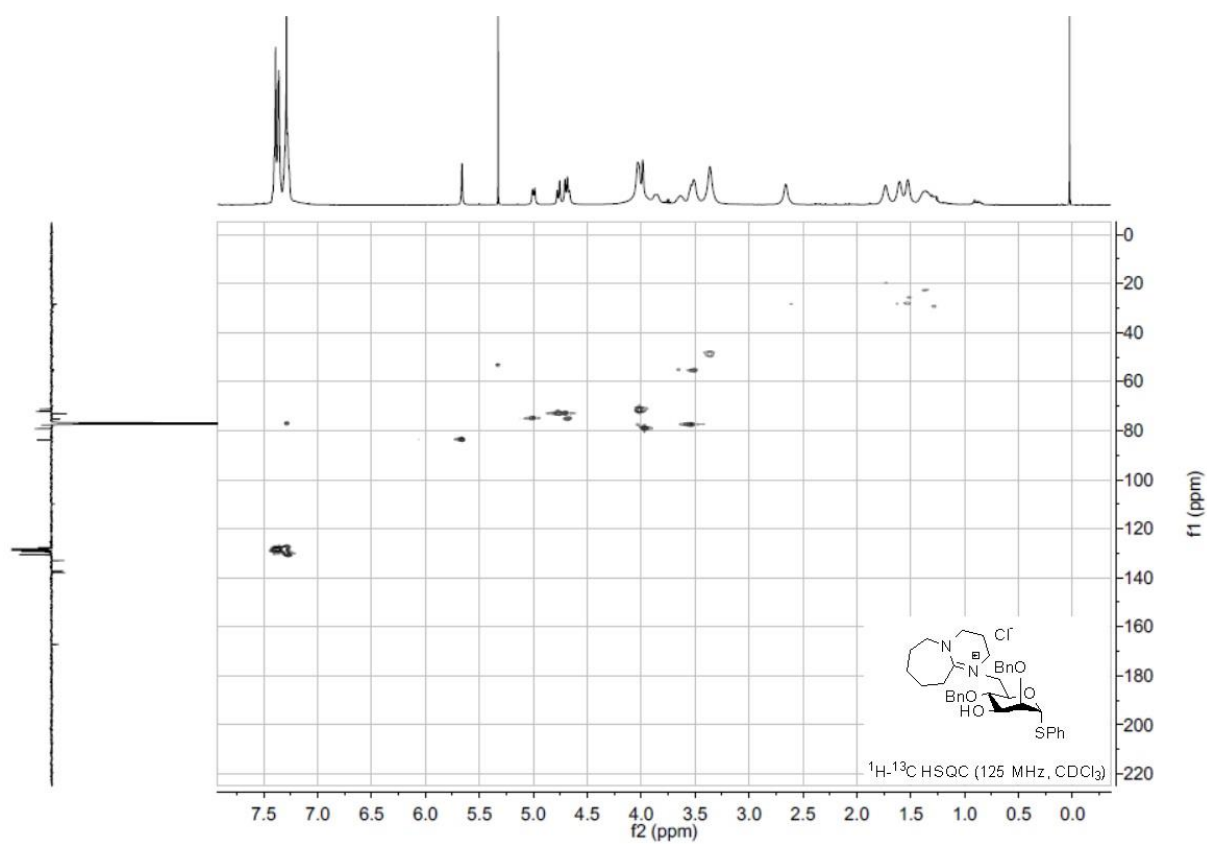



$^1\text{H}$  and  $^{13}\text{C}$  NMR spectra of compound **50**

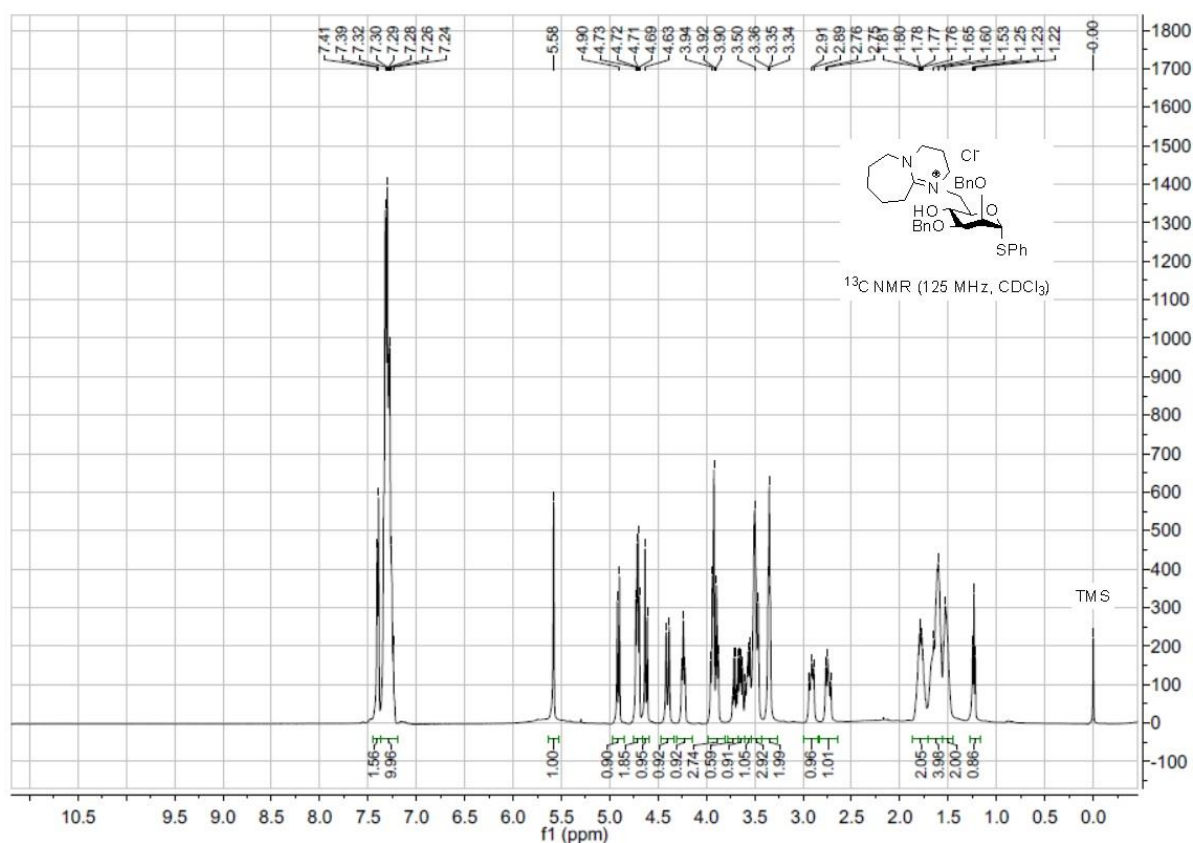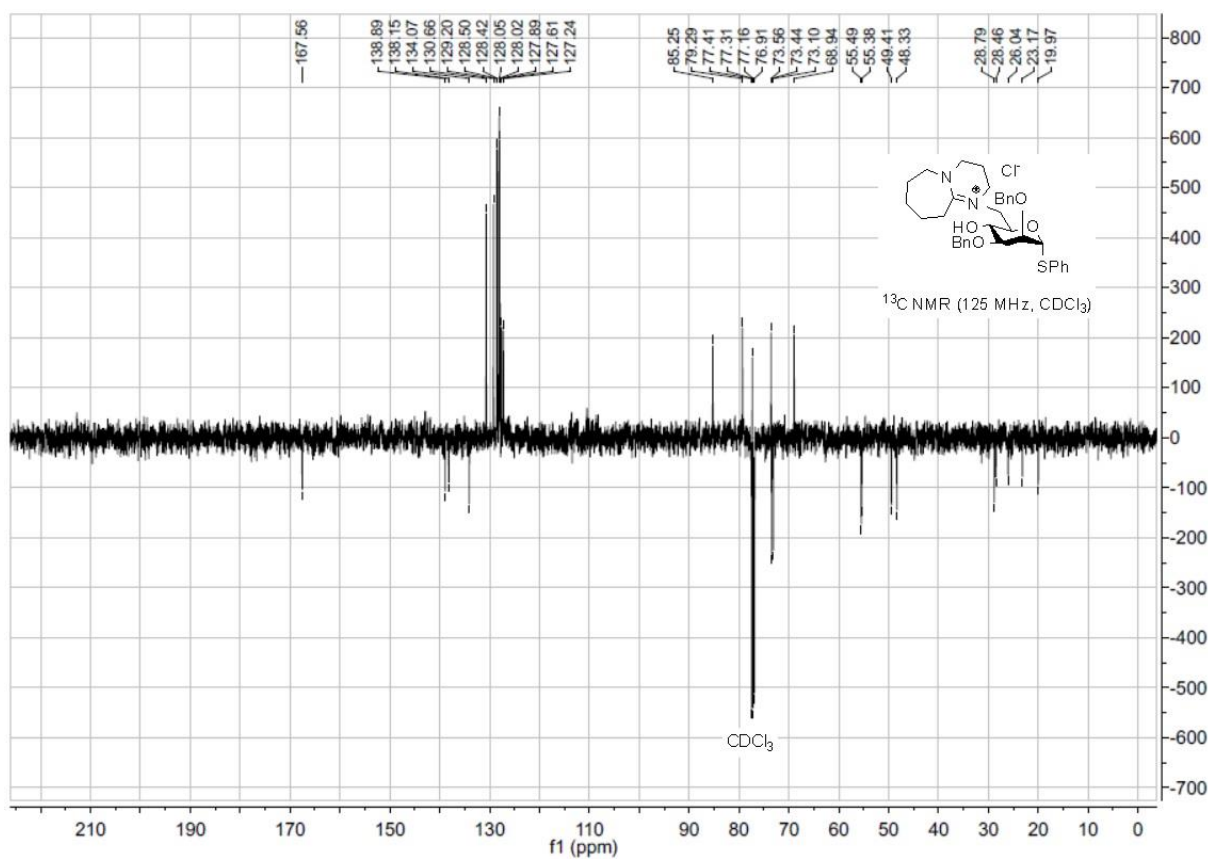



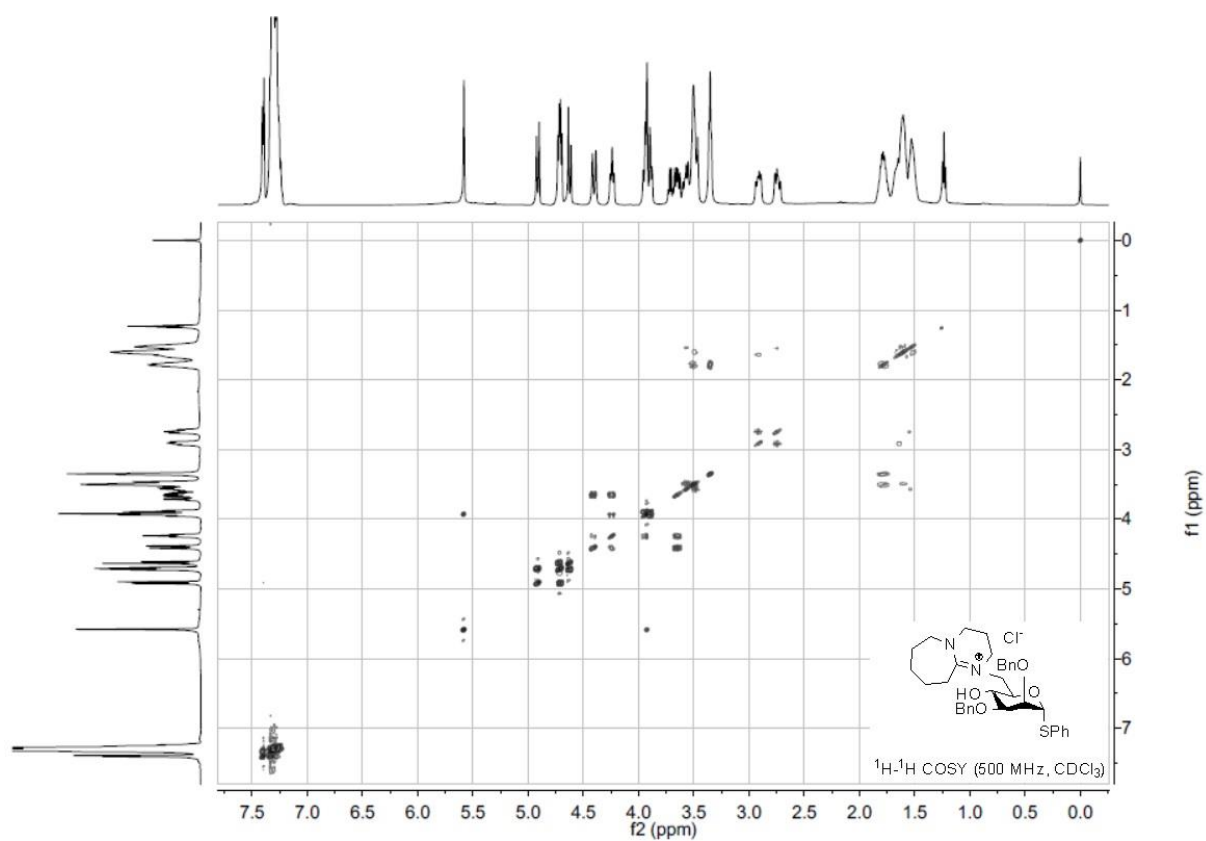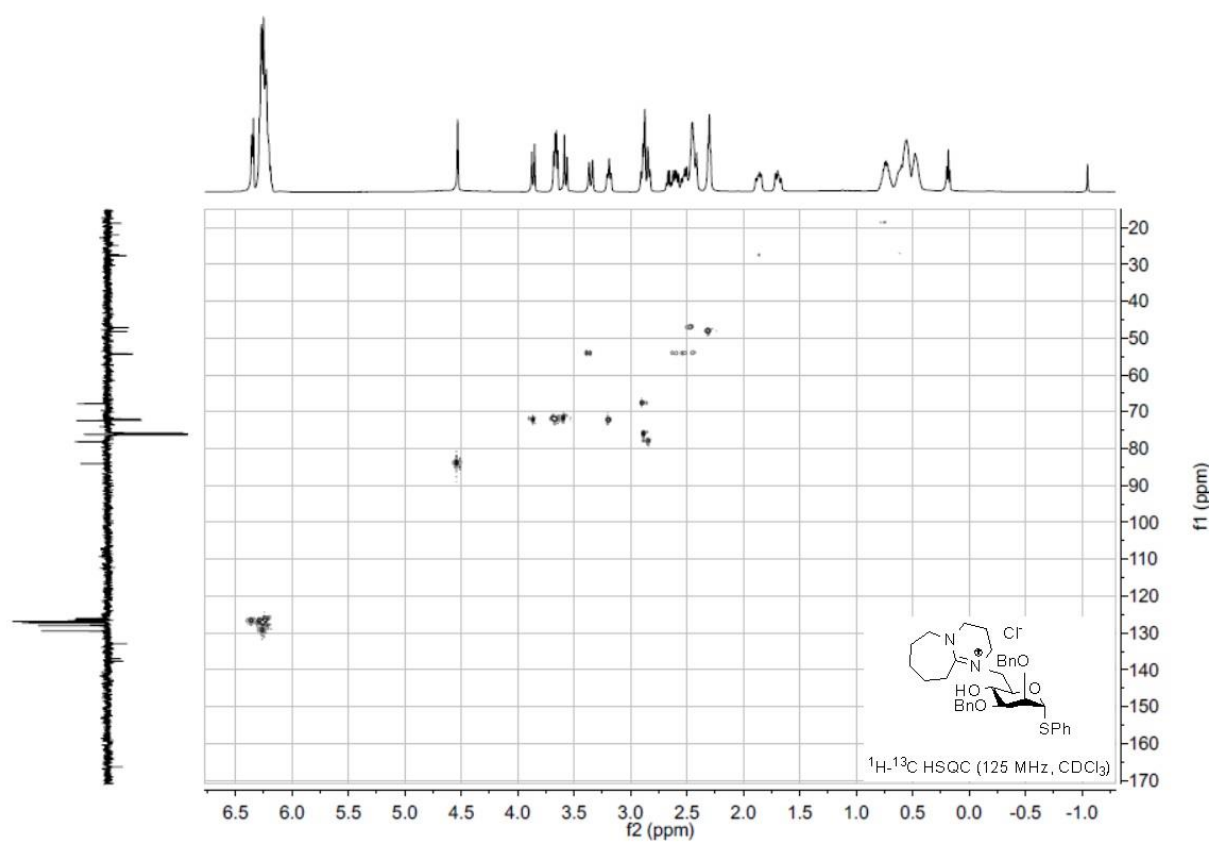

$^1\text{H}$  and  $^{13}\text{C}$  NMR spectra of compound **51**

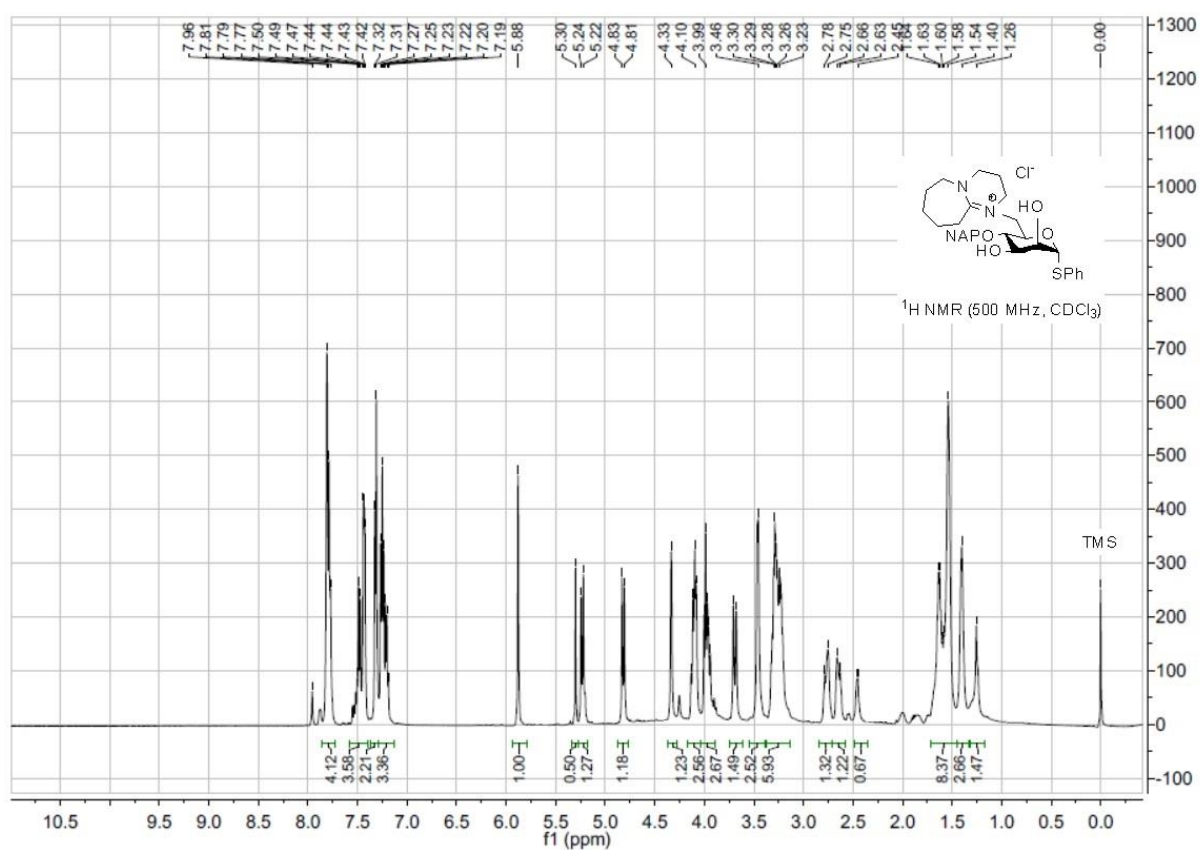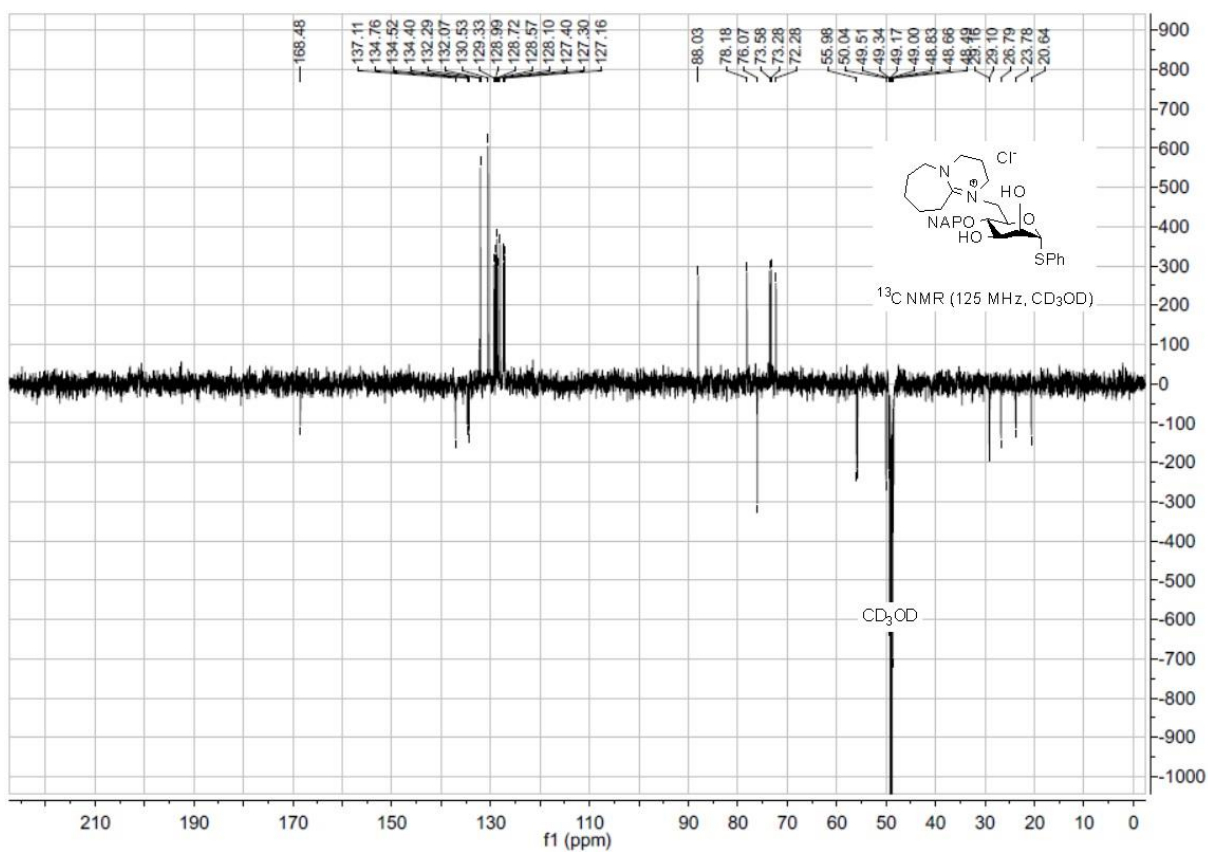

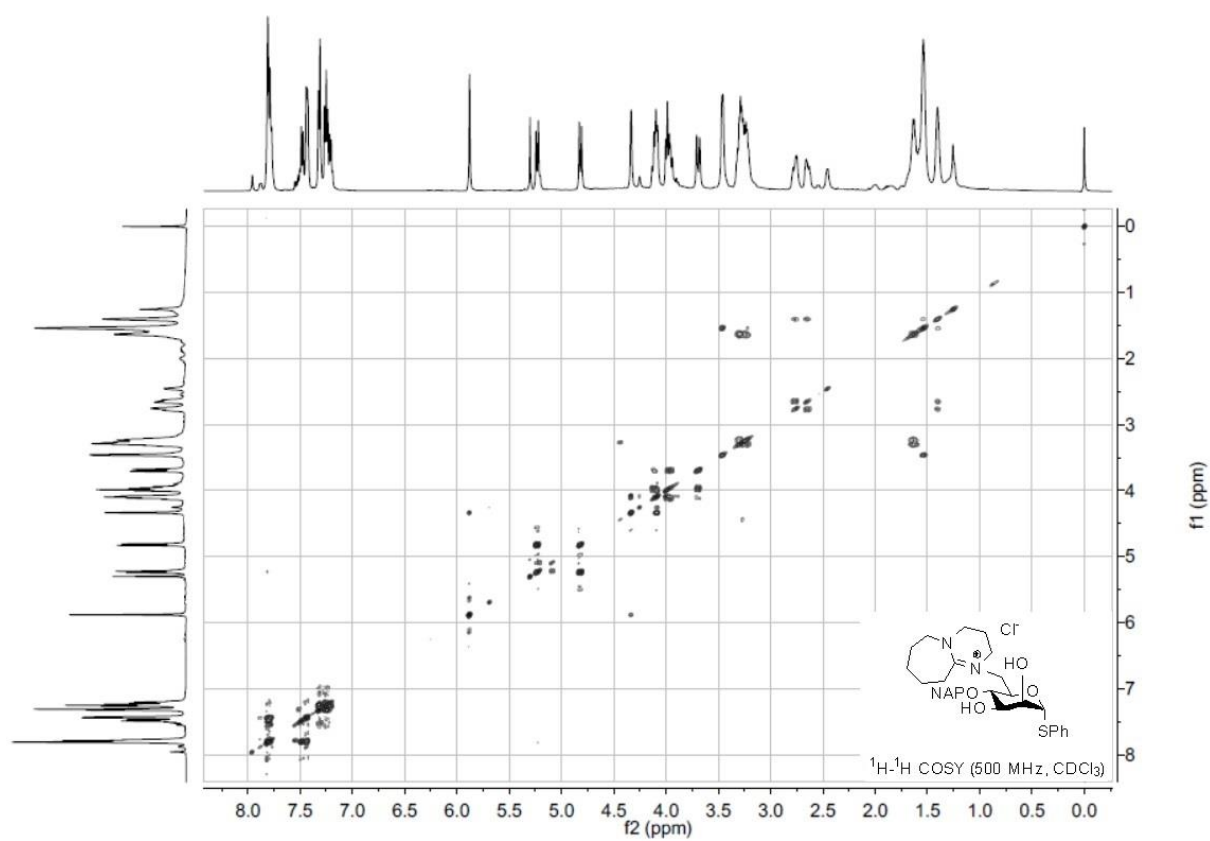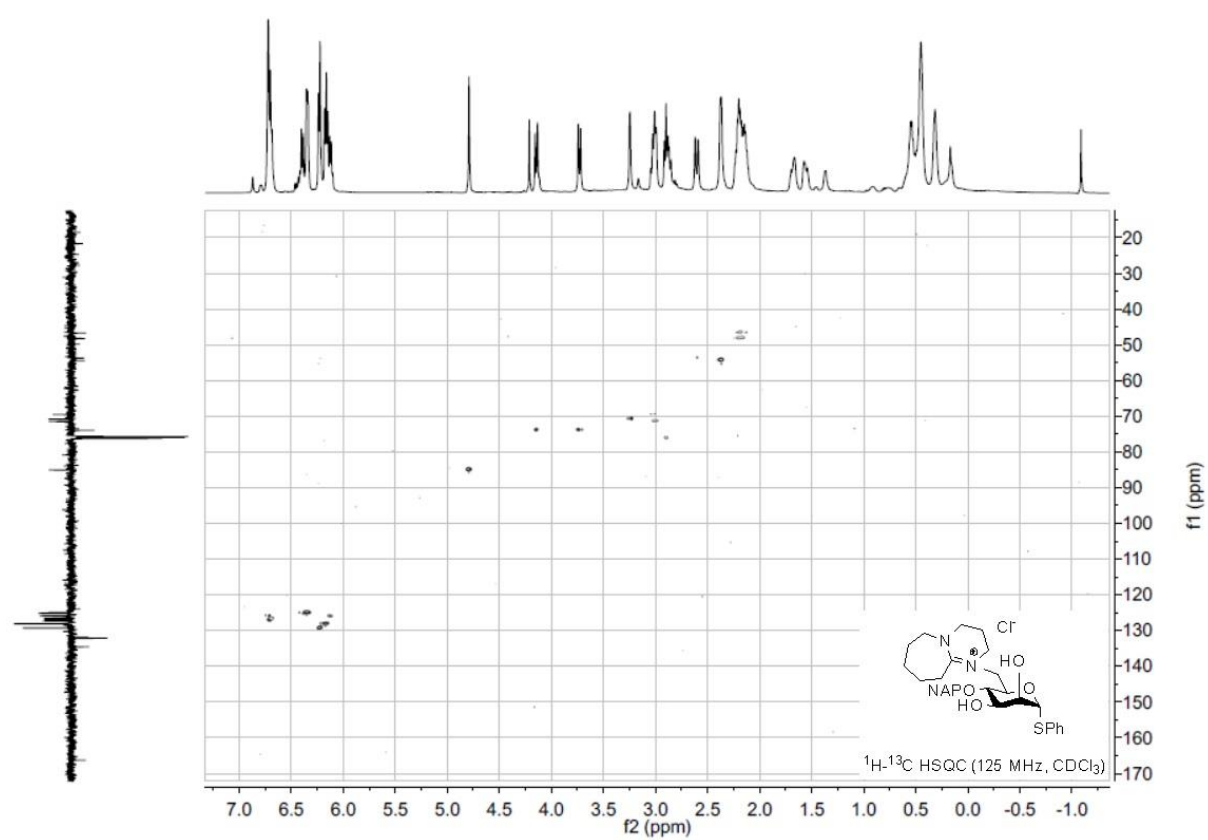

$^1\text{H}$  and  $^{13}\text{C}$  NMR spectra of compound **52**

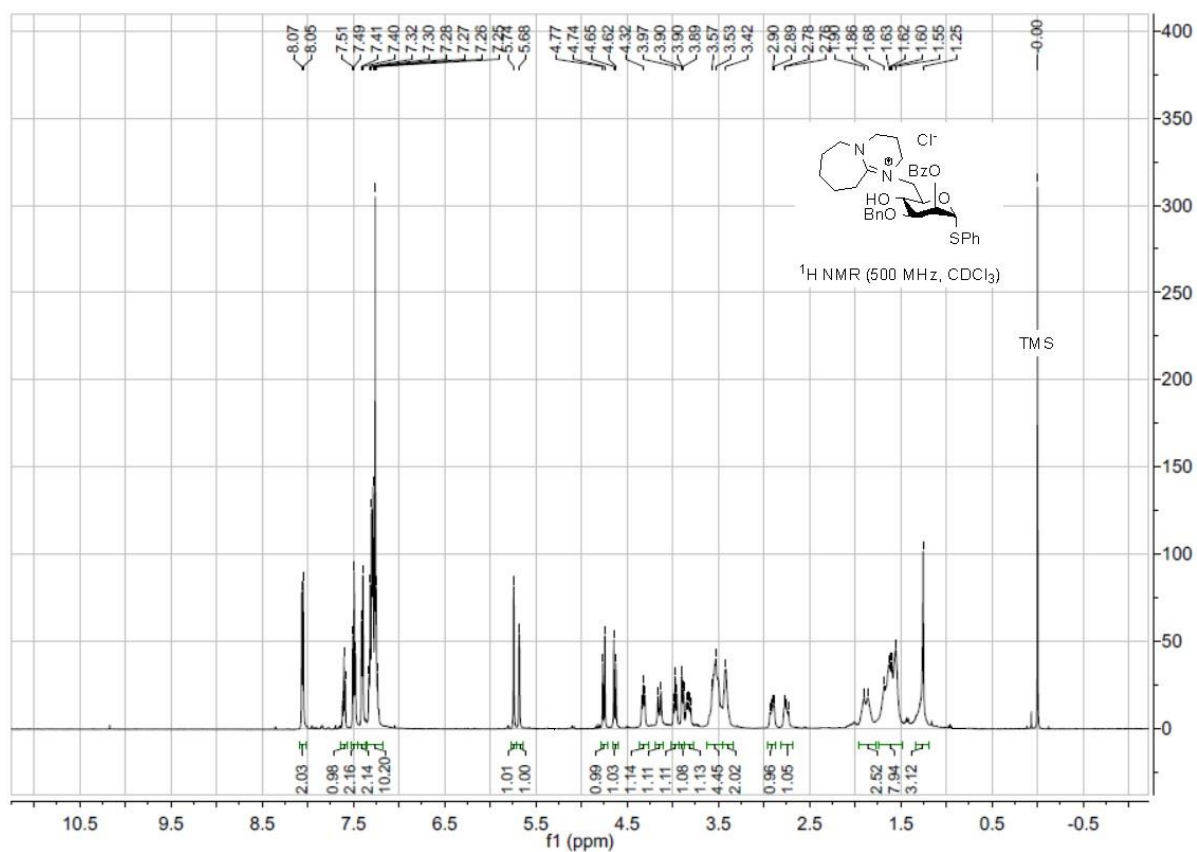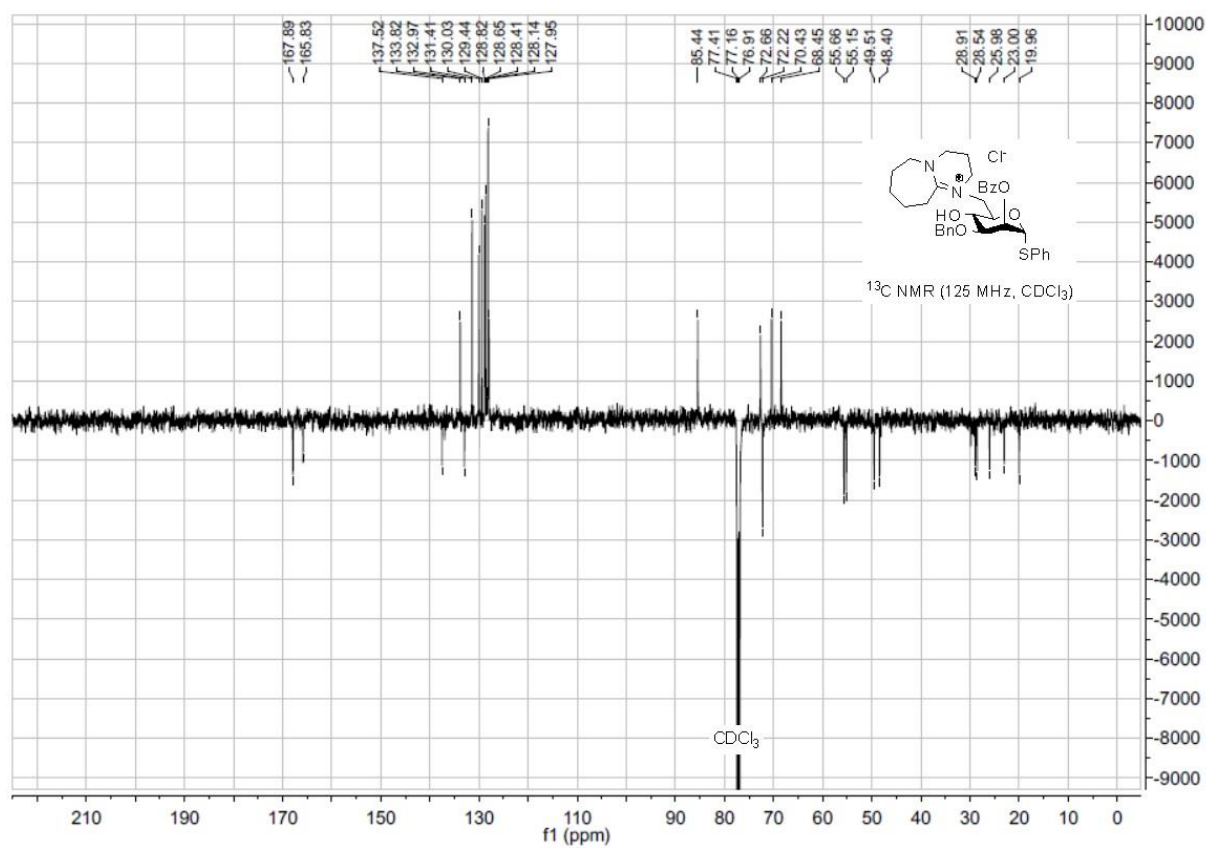

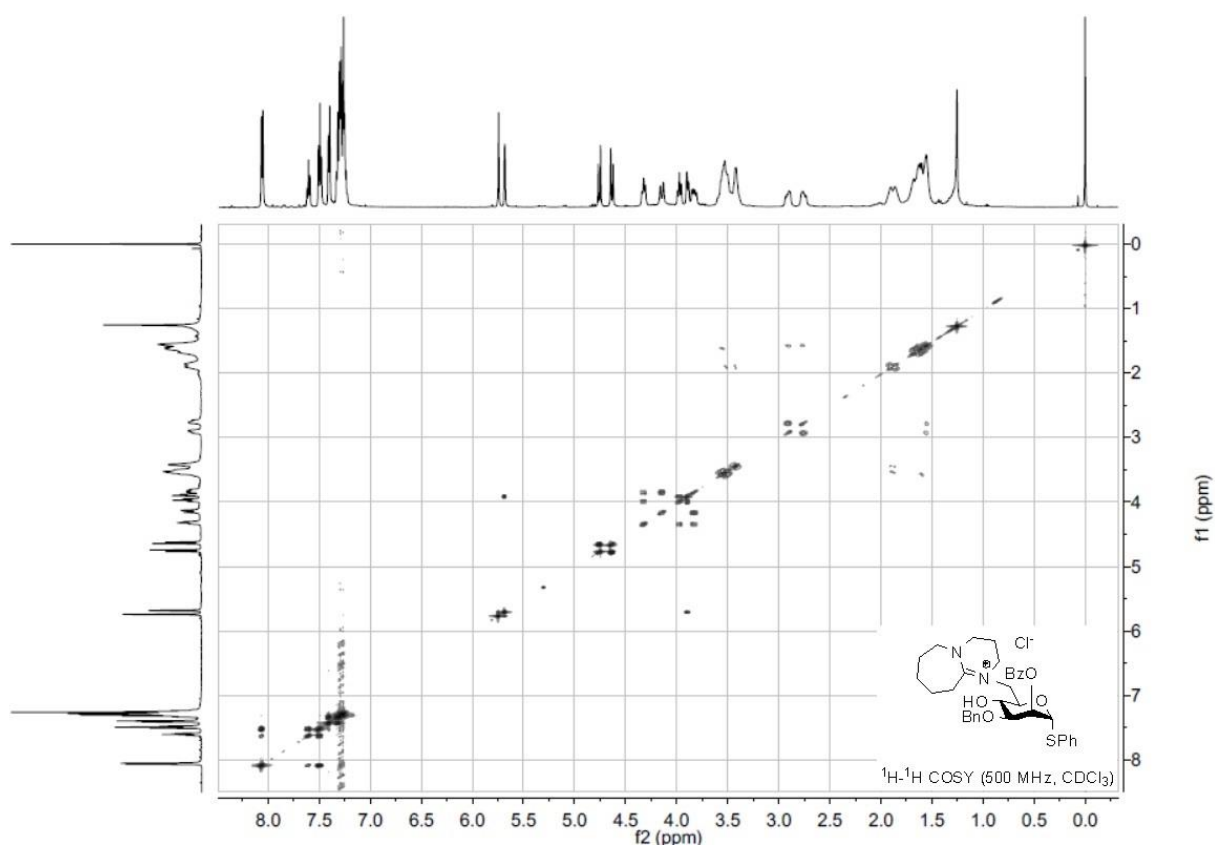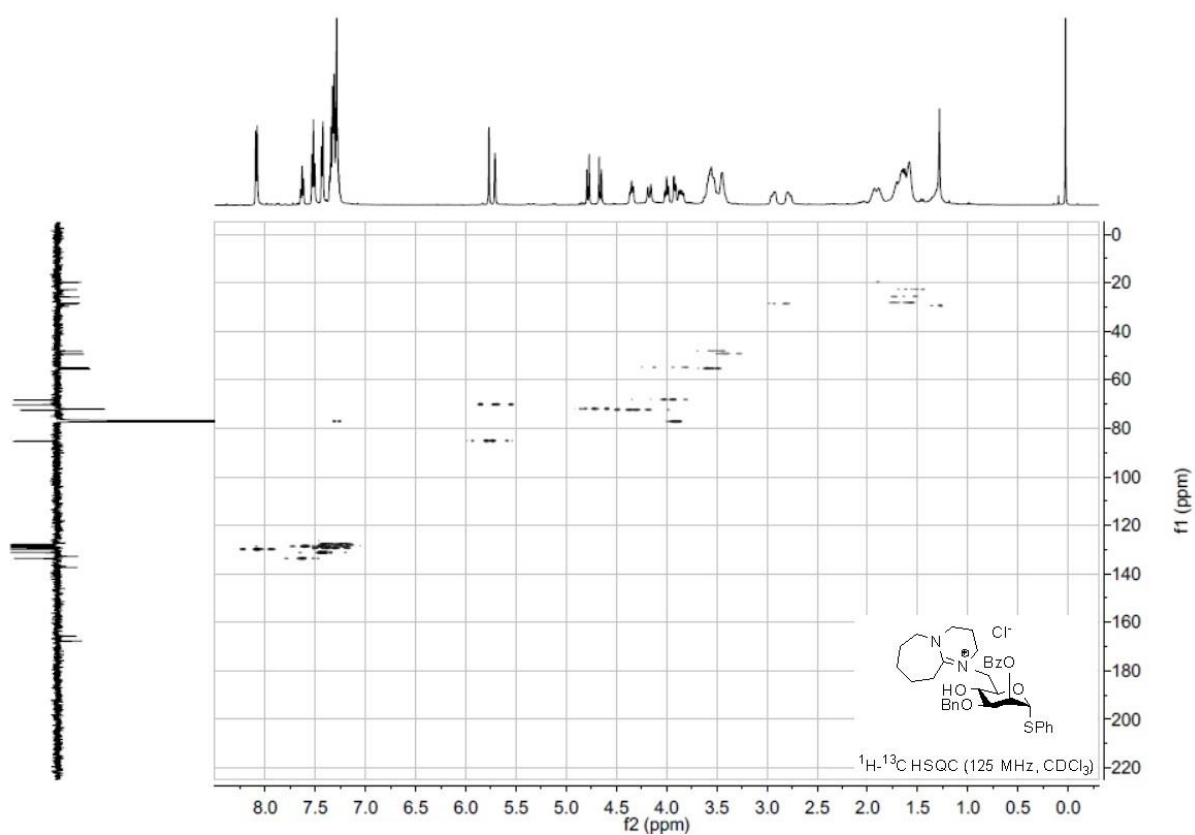

$^1\text{H}$  and  $^{13}\text{C}$  NMR spectra of compound **53**

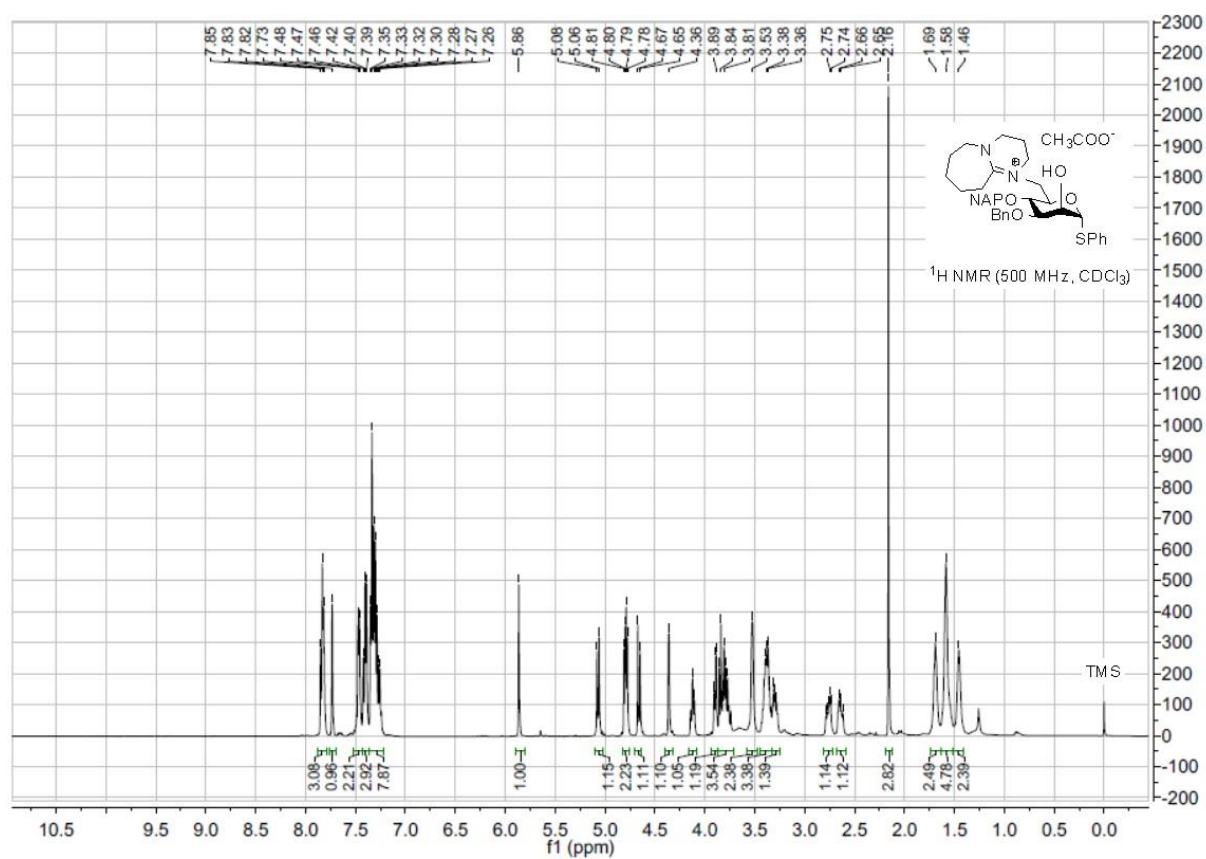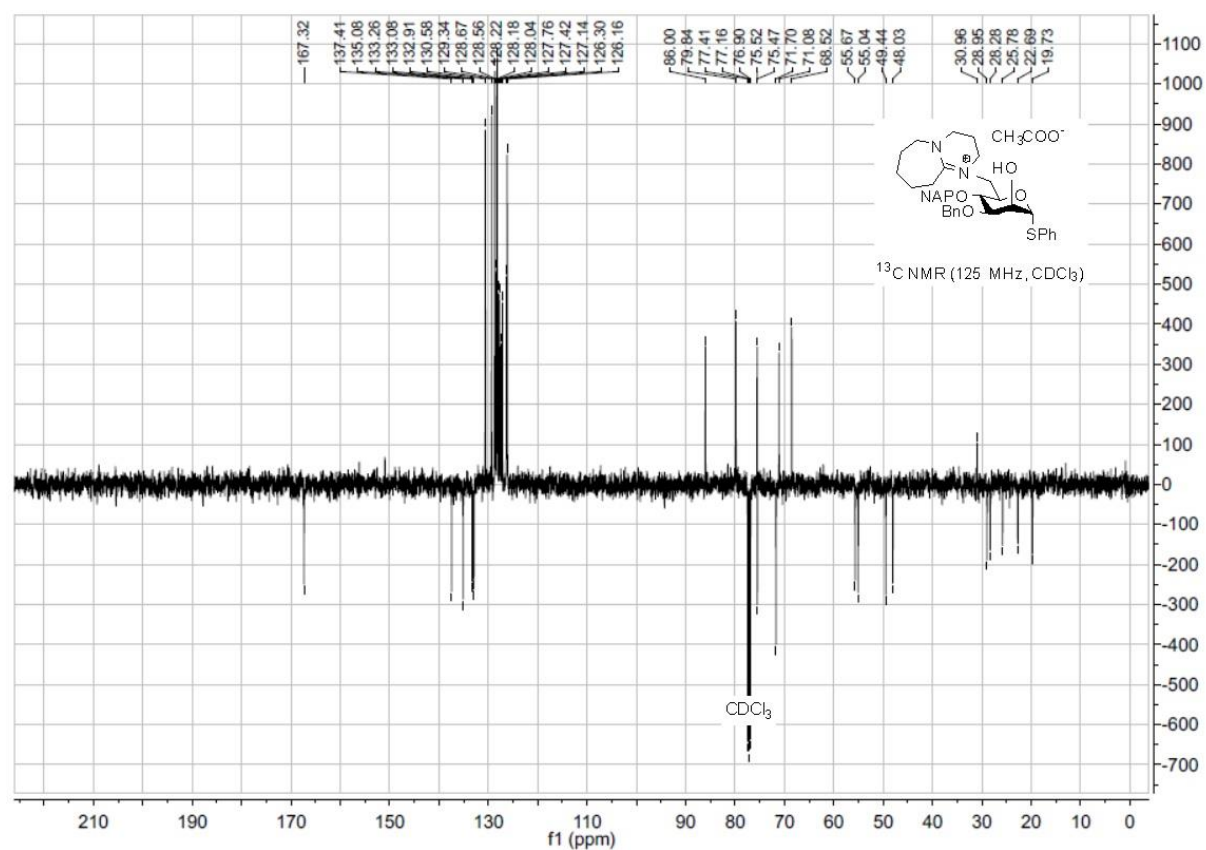

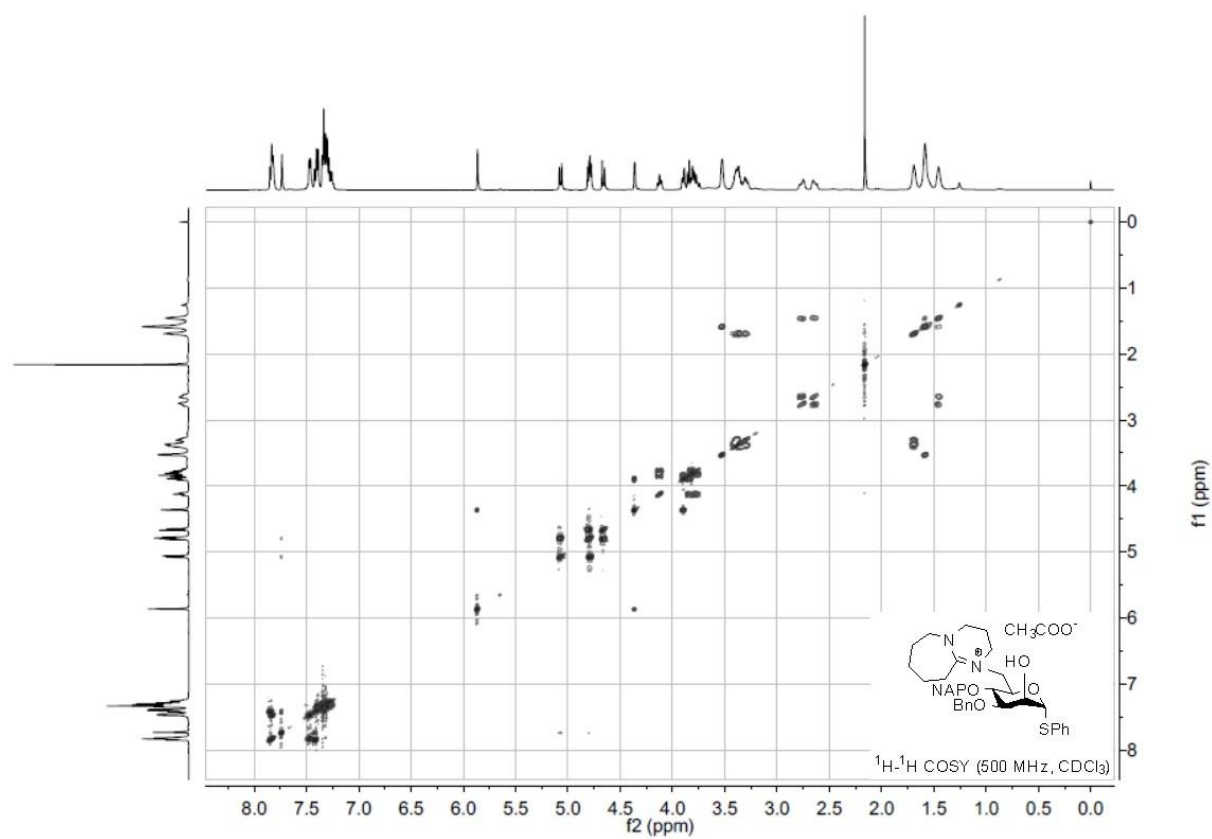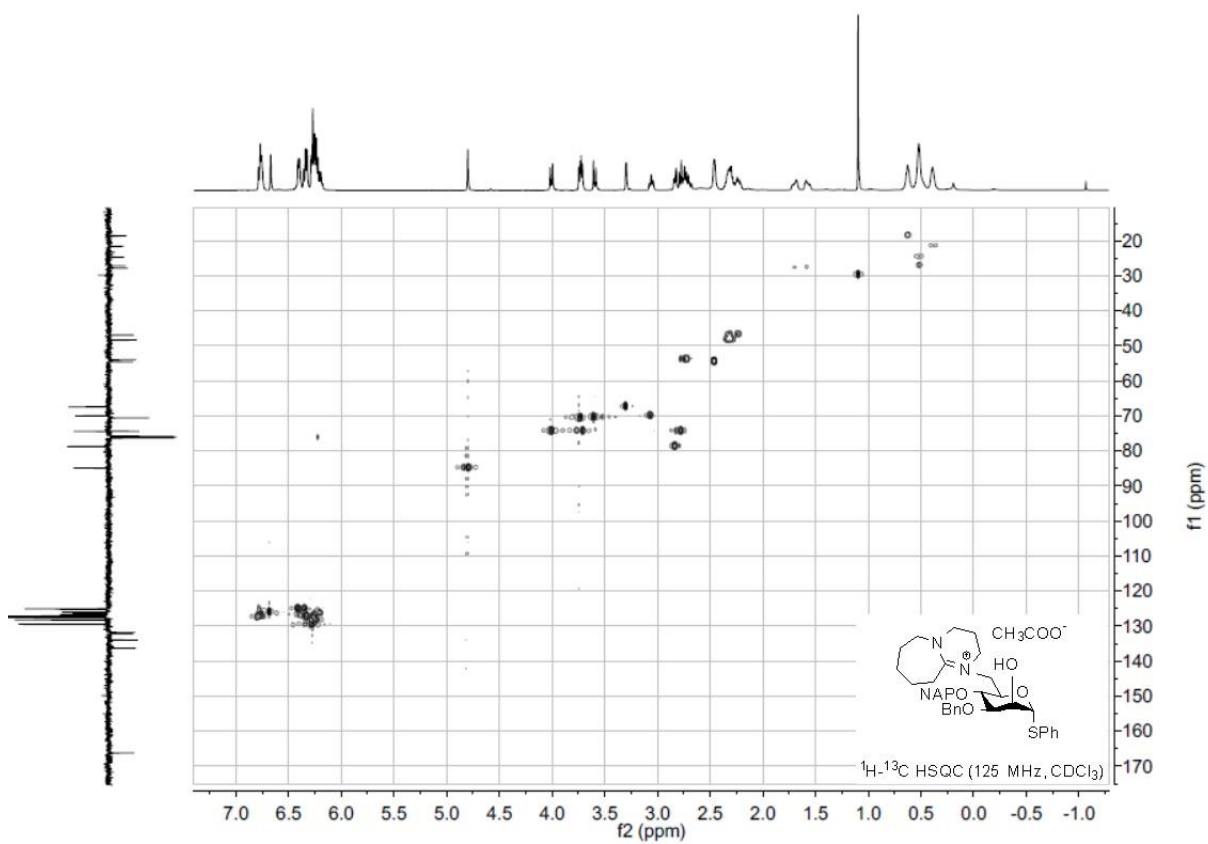

Supplement: s1 [file s1]
